# Supplementary material for: Regulation of intestinal flora by Suaeda salsa extract ameliorates hyperglycemia in a mouse model of type 2 diabetes mellitus
Source: Frontiers journal article supplement (doi:10.3389/fnut.2024.1499196), 2024-12-16
Supplement: Data_Sheet_1.ZIP [file Data_Sheet_1.ZIP]

## Sheet: Sheet1
index	MS2_name	RT	m/z	HG	Class	CAS	HMDB	C_ID
M397T300_NEG	S-Adenosylmethionine	5.008	397.131	19646.8	5'-deoxyribonucleosides	485-80-3	HMDB0001185	C00019
M250T212_NEG	5'-deoxyadenosine	3.535	250.106	193535	5'-deoxyribonucleosides	4754-39-6	HMDB0001983	-
M298T106_POS	S-methyl-5'-thioadenosine	1.766	298.096	383692	5'-deoxyribonucleosides	2457-80-9	HMDB0001173	C00170
M445T514_POS	Mitoxantrone	8.564	445.202	16626.6	Anthracenes	65271-80-9	HMDB0015335	-
M515T377_POS	Carminic acid	6.281	515.087	44813.6	Anthracenes	1260-17-9	HMDB0030658	-
M436T252_POS	Aloin	4.192	436.148	46303.2	Anthracenes	8015-61-0	HMDB0035219	-
M285T360_POS	Rhein	6.003	285.039	132288	Anthracenes	478-43-3	HMDB0032876	-
M232T183_POS	Aminophenazone	3.056	232.143	15105.3	Azoles	58-15-1	HMDB0015493	-
M157T370_NEG	Allantoin	6.166	157.061	45526.3	Azoles	97-59-6	HMDB0000462	-
M338T329_POS	Famotidine	5.486	338.075	46654.6	Azoles	76824-35-6	HMDB0001919	-
M336T441_NEG	Famotidine	7.348	336.058	56012.6	Azoles	76824-35-6	HMDB0001919	-
M292T386_NEG	Oxaprozin	6.436	292.091	69701.4	Azoles	21256-18-8	HMDB0015126	-
M189T66_POS	Antipyrine	1.097	189.112	97641.8	Azoles	60-80-0	HMDB0015503	-
M126T52_POS	5-(2-hydroxyethyl)-4-methylthiazole	0.863	126.02	146050	Azoles	137-00-8	HMDB0032985	C04294
M235T153_POS	Zolpidem	2.552	235.118	739618	Azoles	82626-48-0	HMDB0005023	-
M492T258_NEG	Imatinib	4.306	492.233	14190.9	Azolidines	152459-95-5	HMDB0014757	-
M270T410_NEG	Dantrolene	6.836	270.062	94860.4	Azolidines	7261-97-4	HMDB0015350	-
M332T372_POS	Iprodione	6.207	332.038	536644	Azolidines	36734-19-7	HMDB0031795	-
M235T277_NEG	Carbamazepine	4.611	235.107	19660	Benzazepines	298-46-4	HMDB0014704	C06868
M267T150_POS	Desipramine	2.498	267.207	97495.1	Benzazepines	50-47-5	HMDB0015282	-
M281T145_2_POS	Imipramine	2.423	281.221	108625	Benzazepines	50-49-7	HMDB0001848	-
M343T385_NEG	Formoterol	6.414	343.157	10226.5	Benzene and substituted derivatives	67346-49-0	HMDB0015399	-
M270T270_POS	Orphenadrine	4.506	270.19	11172.5	Benzene and substituted derivatives	83-98-7	HMDB0015304	-
M238T312_POS	Alachlor	5.199	238.106	11302.8	Benzene and substituted derivatives	15972-60-8	HMDB0031766	-
M276T362_POS	Paraoxon	6.035	276.08	12407.5	Benzene and substituted derivatives	311-45-5	HMDB0013035	C06606
M513T247_NEG	Telmisartan	4.12	513.222	12412.2	Benzene and substituted derivatives	144701-48-4	HMDB0015101	-
M284T323_POS	Nitrofen	5.381	283.974	13300.6	Benzene and substituted derivatives	1836-75-5	HMDB0041951	-
M359T379_1_POS	Hippuric acid	6.324	359.111	13909.2	Benzene and substituted derivatives	495-69-2	HMDB0000714	C01586
M477T458_POS	Loperamide	7.633	477.211	14133.2	Benzene and substituted derivatives	53179-11-6	HMDB0004999	-
M284T368_NEG	Letrozole	6.134	284.078	14919.6	Benzene and substituted derivatives	112809-51-5	HMDB0015141	-
M439T259_POS	Alfentanyl	4.323	439.223	15086.5	Benzene and substituted derivatives	71195-58-9	HMDB0014940	-
M107T268_POS	2-hydroxybenzyl alcohol	4.475	107.048	18413.2	Benzene and substituted derivatives	1990-01-07	HMDB0059709	-
M346T419_POS	Isofenphos	6.988	346.111	19530.1	Benzene and substituted derivatives	25311-71-1	HMDB0031796	-
M470T114_POS	Ebastine	1.898	470.325	19714.8	Benzene and substituted derivatives	90729-43-4	HMDB0060159	-
M305T163_NEG	Fluconazole	2.722	305.117	21001.2	Benzene and substituted derivatives	86386-73-4	HMDB0014342	-
M235T271_POS	Lidocaine	4.517	235.201	22730.6	Benzene and substituted derivatives	137-58-6	HMDB0014426	C07073
M181T370_POS	4-hydroxyphenylpyruvate	6.163	181.057	23450	Benzene and substituted derivatives	156-39-8	HMDB0000707	C01179
M255T411_POS	Ketoprofen	6.847	255.095	24886.8	Benzene and substituted derivatives	22071-15-4	HMDB0015144	-
M252T91_NEG	Sulfamethoxazole	1.522	252.053	28388.8	Benzene and substituted derivatives	723-46-6	HMDB0015150	-
M245T300_POS	Amprenavir	5.006	245.148	31631.5	Benzene and substituted derivatives	161814-49-9	HMDB0014839	-
M288T250_POS	Cyproheptadine	4.17	288.191	31689.5	Benzene and substituted derivatives	961-71-7	HMDB0240227	-
M152T214_POS	Methyl 2-aminobenzoate	3.563	152.07	34183.7	Benzene and substituted derivatives	134-20-3	HMDB0029703	-
M256T358_1_POS	Sulfathiazole	5.971	256.013	34385.6	Benzene and substituted derivatives	72-14-0	HMDB0015619	-
M274T430_NEG	Paraoxon	7.175	274.022	35037.2	Benzene and substituted derivatives	311-45-5	HMDB0013035	C06606
M321T348_NEG	Chloramphenicol	5.794	320.994	36315.6	Benzene and substituted derivatives	56-75-7	HMDB0014589	-
M439T31_NEG	Candesartan	0.511	439.174	37156.8	Benzene and substituted derivatives	139481-59-7	HMDB0014934	-
M281T455_POS	Voriconazole	7.59	281.078	38160.9	Benzene and substituted derivatives	137234-62-9	HMDB0014720	-
M279T34_POS	Dibutyl phthalate	0.575	279.158	38657.8	Benzene and substituted derivatives	84-74-2	HMDB0033244	-
M405T26_NEG	Hexachlorophene	0.435	404.841	40892	Benzene and substituted derivatives	70-30-4	HMDB0014894	-
M196T83_POS	2-Phenylacetamide	1.382	196.094	41952.4	Benzene and substituted derivatives	103-81-1	HMDB0010715	C02505
M149T33_POS	1,2-benzenedicarboxylic acid	0.553	149.022	42128.9	Benzene and substituted derivatives	88-99-3	HMDB0002107	C01606
M275T32_NEG	Flutamide	0.532	275.056	44839.6	Benzene and substituted derivatives	13311-84-7	HMDB0014642	C07653
M507T406_NEG	Ketoprofen	6.76	507.19	45207	Benzene and substituted derivatives	22071-15-4	HMDB0015144	-
M385T248_POS	Ibutilide	4.138	385.272	46174.1	Benzene and substituted derivatives	122647-32-9	HMDB0014453	-
M387T34_NEG	Cetirizine	0.565	387.144	50039.7	Benzene and substituted derivatives	83881-51-0	HMDB0005032	-
M274T384_POS	Cyclopentolate	6.4	274.186	54306.8	Benzene and substituted derivatives	512-15-2	HMDB0015114	-
M247T354_NEG	Dapsone	5.9	246.979	61356	Benzene and substituted derivatives	80-08-0	HMDB0014395	-
M138T208_POS	Tyramine	3.465	138.09	63794.8	Benzene and substituted derivatives	51-67-2	HMDB0000306	C00483
M122T185_POS	Phenylethylamine	3.089	122.095	64634.6	Benzene and substituted derivatives	64-04-0	HMDB0012275	C05332
M327T31_2_NEG	Labetalol	0.522	327.177	66135	Benzene and substituted derivatives	36894-69-6	HMDB0014736	-
M315T138_POS	Valdecoxib	2.294	315.1	69723.4	Benzene and substituted derivatives	181695-72-7	HMDB0005033	-
M281T324_1_NEG	Niflumic acid	5.394	281.052	70452.7	Benzene and substituted derivatives	4394-00-7	HMDB0015573	-
M413T344_NEG	Flecainide	5.74	413.128	73561	Benzene and substituted derivatives	54143-55-4	HMDB0015326	-
M310T327_NEG	4'-hydroxydiclofenac	5.456	310.007	75187.8	Benzene and substituted derivatives	64118-84-9	HMDB0013974	-
M273T117_POS	Sotalol	1.954	273.126	77045.8	Benzene and substituted derivatives	3930-20-9	HMDB0014632	-
M423T153_NEG	Eprosartan	2.547	423.136	79330.8	Benzene and substituted derivatives	133040-01-4	HMDB0015014	-
M289T318_POS	Chloramphenicol	5.307	288.991	89406.7	Benzene and substituted derivatives	56-75-7	HMDB0014589	-
M407T373_POS	Eprosartan	6.217	407.131	89992	Benzene and substituted derivatives	133040-01-4	HMDB0015014	-
M105T175_POS	2-phenylethanol	2.924	105.069	93411.3	Benzene and substituted derivatives	56011-02-0	HMDB0041615	C05853
M196T47_POS	isocarboxazid	0.778	196.09	102860	Benzene and substituted derivatives	59-63-2	HMDB0015377	-
M220T379_POS	Ketamine	6.324	220.023	102930	Benzene and substituted derivatives	6740-88-1	HMDB0015352	-
M148T56_POS	Ephedrine	0.941	148.096	116886	Benzene and substituted derivatives	299-42-3	HMDB0015451	C01575
M152T298_2_POS	N-methylanthranilate	4.974	152.069	118245	Benzene and substituted derivatives	119-68-6	HMDB0032609	C03005
M347T57_NEG	Anacardic acid	0.954	347.257	123462	Benzene and substituted derivatives	103904-74-1	HMDB0033896	-
M258T185_POS	Fluvoxamine	3.089	258.107	125484	Benzene and substituted derivatives	54739-18-3	HMDB0014322	-
M107T75_POS	Pyrimethanil	1.252	107.059	126875	Benzene and substituted derivatives	53112-28-0	HMDB0033135	-
M329T351_NEG	Furosemide	5.857	328.981	127312	Benzene and substituted derivatives	54-31-9	HMDB0001933	-
M294T340_POS	Anastrozole	5.663	294.154	128660	Benzene and substituted derivatives	120511-73-1	HMDB0015348	-
M397T31_3_NEG	Mitragynine	0.511	397.222	132718	Benzene and substituted derivatives	6202-22-8	HMDB0041933	-
M243T119_POS	Ethiofencarb	1.987	243.134	133186	Benzene and substituted derivatives	29973-13-5	HMDB0031782	-
M184T247_NEG	N-hydroxy-4-aminobiphenyl	4.12	184.06	133677	Benzene and substituted derivatives	6810-26-0	HMDB0062723	C03622
M253T300_NEG	Sotalol	5.008	253.117	134592	Benzene and substituted derivatives	3930-20-9	HMDB0014632	-
M234T93_POS	Fenamiphos	1.552	234.041	135875	Benzene and substituted derivatives	22224-92-6	HMDB0031787	-
M255T304_POS	Dofetilide	5.059	255.133	140620	Benzene and substituted derivatives	115256-11-6	HMDB0014349	-
M365T252_POS	Bumetanide	4.203	365.14	145650	Benzene and substituted derivatives	28395-03-1	HMDB0015024	-
M502T205_POS	Fexofenadine	3.422	502.289	169484	Benzene and substituted derivatives	83799-24-0	HMDB0005030	C06999
M265T40_POS	Cyclizine	0.675	265.194	171613	Benzene and substituted derivatives	82-92-8	HMDB0015307	-
M438T51_POS	Salmeterol	0.852	438.263	191243	Benzene and substituted derivatives	89365-50-4	HMDB0015073	-
M326T116_POS	Tolterodine	1.932	326.268	222092	Benzene and substituted derivatives	124937-51-5	HMDB0015170	-
M152T252_NEG	3-hydroxyanthranilic acid	4.197	152.038	260804	Benzene and substituted derivatives	548-93-6	HMDB0001476	C00632
M414T51_NEG	Salmeterol	0.858	414.264	278753	Benzene and substituted derivatives	89365-50-4	HMDB0015073	-
M173T355_POS	P-toluenesulfonic acid	5.918	173.029	280533	Benzene and substituted derivatives	104-15-4	HMDB0059933	C06677
M307T86_NEG	Phenylbutazone	1.439	307.131	465538	Benzene and substituted derivatives	50-33-9	HMDB0014950	-
M324T118_NEG	Tolterodine	1.975	324.251	628657	Benzene and substituted derivatives	124937-51-5	HMDB0015170	-
M94T218_POS	Aniline	3.629	94.0656	771287	Benzene and substituted derivatives	62-53-3	HMDB0003012	C00292
M139T233_POS	3-hydroxybenzoic acid	3.876	139.058	1.26574e+06	Benzene and substituted derivatives	1999-06-09	HMDB0002466	C00587
M261T275_POS	Oxymetazoline	4.59	261.18	1.34504e+06	Benzene and substituted derivatives	1491-59-4	HMDB0015070	-
M454T209_POS	Terfenadine	3.476	454.329	1.49366e+06	Benzene and substituted derivatives	50679-08-8	HMDB0014486	-
M194T124_NEG	Salicyluric acid	2.073	194.048	3.89814e+06	Benzene and substituted derivatives	487-54-7	HMDB0000840	-
M344T421_NEG	Omeprazole	7.011	344.105	12506.8	Benzimidazoles	73590-58-6	HMDB0001913	-
M382T85_NEG	Pantoprazole	1.417	382.056	13015	Benzimidazoles	102625-70-7	HMDB0005017	-
M366T357_POS	Pantoprazole	5.95	366.061	15162.9	Benzimidazoles	102625-70-7	HMDB0005017	-
M264T213_1_NEG	Albendazole	3.557	264.089	18541.5	Benzimidazoles	54965-21-8	HMDB0014659	-
M328T413_POS	Omeprazole	6.879	328.105	32033.5	Benzimidazoles	73590-58-6	HMDB0001913	-
M280T320_NEG	Nitrazepam	5.331	280.084	14009.1	Benzodiazepines	146-22-5	HMDB0015534	-
M243T342_1_POS	Nordazepam	5.694	243.073	26202.3	Benzodiazepines	1088-11-5	HMDB0060538	-
M276T212_POS	Flumazenil	3.531	276.068	28451.2	Benzodiazepines	78755-81-4	HMDB0015336	-
M352T133_POS	Pirenzepine	2.218	352.187	42337.9	Benzodiazepines	28797-61-7	HMDB0014808	-
M295T448_POS	Estazolam	7.459	295.093	45031.6	Benzodiazepines	29975-16-4	HMDB0015346	-
M270T374_POS	Clozapine	6.228	270.065	1.06874e+06	Benzodiazepines	5786-21-0	HMDB0014507	-
M445T336_POS	Mangiferin	5.6	445.084	14033.6	Benzopyrans	4773-96-0	HMDB0034410	-
M377T294_NEG	Gartanin	4.908	377.153	16901.3	Benzopyrans	33390-42-0	HMDB0030700	-
M583T118_NEG	Gambogic acid	1.975	583.321	18255.5	Benzopyrans	2752-65-0	HMDB0034095	-
M540T300_POS	Salviaflaside	4.995	540.183	24779.9	Benzopyrans	178895-25-5	HMDB0033705	-
M629T469_POS	Gambogic acid	7.821	629.236	30975.2	Benzopyrans	2752-65-0	HMDB0034095	-
M451T518_POS	Garcinone d	8.639	451.19	37308.2	Benzopyrans	107390-08-9	HMDB0033332	-
M257T410_NEG	Isogentisin	6.826	257.026	41619.1	Benzopyrans	491-64-5	HMDB0030871	-
M404T458_POS	Perphenazine	7.633	404.165	22507.9	Benzothiazines	58-39-9	HMDB0014988	-
M374T433_POS	Prochlorperazine	7.219	374.15	25352.9	Benzothiazines	58-38-8	HMDB0014577	-
M412T421_POS	Acetophenazine	7.01	412.215	27620.6	Benzothiazines	2751-68-0	HMDB0015196	-
M285T306_POS	Promethazine	5.102	285.144	133152	Benzothiazines	60-87-7	HMDB0015202	-
M285T424_POS	Promazine	7.065	285.143	174248	Benzothiazines	58-40-2	HMDB0014564	-
M280T385_POS	Doxepin	6.41	280.173	17943.6	Benzoxepines	1668-19-5	HMDB0015273	-
M338T428_POS	Olopatadine	7.131	338.153	33830.9	Benzoxepines	113806-05-6	HMDB0014906	-
M336T187_NEG	Olopatadine	3.114	336.157	76419.3	Benzoxepines	113806-05-6	HMDB0014906	-
M284T18_POS	Stearamide	0.292	284.294	18620.2	Carboximidic acids and derivatives	124-26-5	HMDB0034146	-
M188T162_POS	N8-acetylspermidine	2.694	188.163	55650	Carboximidic acids and derivatives	13431-24-8	HMDB0002189	-
M300T38_2_POS	Palmitoyl ethanolamide	0.642	300.288	111964	Carboximidic acids and derivatives	544-31-0	HMDB0002100	C16512
M172T342_POS	Gabapentin	5.705	172.133	10013.2	Carboxylic acids and derivatives	60142-96-3	HMDB0005015	-
M90T435_POS	L-Alanine	7.256	90.054	10258.6	Carboxylic acids and derivatives	302-72-7	HMDB0062251	C00041
M347T364_NEG	Enalaprilat	6.06	347.142	10500.4	Carboxylic acids and derivatives	76420-72-9	HMDB0041886	-
M646T412_POS	Cefoperazone	6.868	646.172	10523.5	Carboxylic acids and derivatives	62893-19-0	HMDB0015424	-
M274T389_NEG	Gln-glu	6.491	274.127	10893.1	Carboxylic acids and derivatives	88830-90-4	HMDB0028796	-
M198T387_POS	N-Acetyl-L-Histidine	6.444	198.086	10933.6	Carboxylic acids and derivatives	2497-02-01	HMDB0032055	-
M174T304_NEG	N-Carboxyethyl-.gamma.-aminobutyric acid	5.063	174.076	11575.5	Carboxylic acids and derivatives	4386-03-02	HMDB0002201	-
M249T367_1_NEG	.gamma.-glu-cys	6.124	249.05	11787.5	Carboxylic acids and derivatives	636-58-8	HMDB0001049	C00669
M273T275_NEG	Gln-lys	4.58	273.179	12089.3	Carboxylic acids and derivatives	45234-03-5	HMDB0028802	-
M248T373_2_NEG	Gln-cys	6.209	248.057	12107.7	Carboxylic acids and derivatives	629653-16-3	HMDB0028794	-
M351T312_NEG	Allantoic acid	5.196	351.12	12111.5	Carboxylic acids and derivatives	99-16-1	HMDB0001209	C00499
M228T473_NEG	Raltitrexed	7.888	228.049	12281.5	Carboxylic acids and derivatives	112887-68-0	HMDB0014438	-
M190T269_POS	N-acetyl-l-glutamate	4.485	190.074	12345.5	Carboxylic acids and derivatives	1188-37-0	HMDB0001138	C00624
M568T115_POS	Nelfinavir	1.921	568.309	12513.3	Carboxylic acids and derivatives	159989-64-7	HMDB0014365	-
M277T304_POS	Glu-Glu	5.07	277.116	12925.3	Carboxylic acids and derivatives	3929-61-1	HMDB0028818	-
M333T254_NEG	Benzylpenicillin	4.229	333.105	13314.7	Carboxylic acids and derivatives	2349-07-07	HMDB0037849	C05551
M155T175_POS	Ornithine	2.913	155.08	13452.1	Carboxylic acids and derivatives	348-66-3	HMDB0003374	-
M206T309_POS	Enalaprilat	5.156	206.137	13904.5	Carboxylic acids and derivatives	76420-72-9	HMDB0041886	-
M402T265_POS	Oxacillin	4.421	402.13	13995.5	Carboxylic acids and derivatives	66-79-5	HMDB0014851	-
M303T359_POS	Phe-his	5.982	303.154	14162.2	Carboxylic acids and derivatives	33367-37-2	HMDB0028997	-
M318T365_NEG	Norfloxacin	6.081	318.107	14244.3	Carboxylic acids and derivatives	70458-96-7	HMDB0015192	C06687
M293T254_NEG	Glu-Phe	4.229	293.113	14644.5	Carboxylic acids and derivatives	20556-22-3	HMDB0029156	-
M211T364_POS	N.epsilon.-acetyl-l-lysine	6.067	211.104	14942.5	Carboxylic acids and derivatives	692-04-6	HMDB0000206	C02727
M295T368_1_POS	Aspartame	6.131	295.122	15726.9	Carboxylic acids and derivatives	22839-47-0	HMDB0001894	C11045
M376T365_POS	Tiagabine	6.088	376.141	15780.1	Carboxylic acids and derivatives	5466-06-08	HMDB0040410	-
M274T444_NEG	Glu-Gln	7.402	274.102	15807.1	Carboxylic acids and derivatives	26848-14-6	HMDB0028817	-
M224T433_POS	N-Acetyl-L-tyrosine	7.219	224.089	16291.3	Carboxylic acids and derivatives	537-55-3	HMDB0000866	-
M425T445_POS	Clindamycin	7.415	425.198	16318.4	Carboxylic acids and derivatives	18323-44-9	HMDB0015321	-
M130T306_NEG	Propionylglycine	5.108	130.05	16381.6	Carboxylic acids and derivatives	21709-90-0	HMDB0000783	-
M304T480_2_POS	Arg-glu	7.997	304.183	17080.8	Carboxylic acids and derivatives	15706-89-5	HMDB0028708	-
M421T325_NEG	Blasticidin s	5.425	421.015	17616.5	Carboxylic acids and derivatives	2079-00-7	HMDB0030452	-
M229T303_POS	gamma-L-Glutamyl-L-valine	5.049	229.117	17744.3	Carboxylic acids and derivatives	2746-34-1	HMDB0011172	C03740
M189T286_POS	Ala-Val	4.763	189.122	17855.8	Carboxylic acids and derivatives	3303-45-5	HMDB0028700	-
M251T69_POS	His-Ile	1.152	251.147	18279	Carboxylic acids and derivatives	129050-48-2	HMDB0028888	-
M304T542_POS	Vildagliptin	9.026	304.222	18624.8	Carboxylic acids and derivatives	274901-16-5	HMDB0015596	-
M447T122_POS	Lopinavir	2.031	447.288	18890.8	Carboxylic acids and derivatives	192725-17-0	HMDB0015539	-
M189T364_POS	Ne-acetyllysine	6.067	189.122	18904	Carboxylic acids and derivatives	692-04-6	HMDB0000206	C02727
M226T118_POS	Arg-Ser	1.965	226.126	19048.9	Carboxylic acids and derivatives	70921-62-9	HMDB0028718	-
M315T156_NEG	L-dihydroorotate	2.602	315.079	19718.6	Carboxylic acids and derivatives	5988-19-2	HMDB0003349	C00337
M281T242_POS	Val-Tyr	4.039	281.148	19896.4	Carboxylic acids and derivatives	3061-91-4	HMDB0029139	-
M393T149_NEG	3,4-dihydroxy-l-phenylalanine	2.491	393.126	19933.6	Carboxylic acids and derivatives	59-92-7	HMDB0000181	C00355
M104T340_1_POS	4-Aminobutyric acid	5.673	104.07	20020.5	Carboxylic acids and derivatives	1956-12-02	HMDB0000112	C00334
M461T445_POS	Quinapril	7.415	461.187	20782	Carboxylic acids and derivatives	85441-61-8	HMDB0015019	-
M545T78_NEG	L-thyronine	1.295	545.205	21427	Carboxylic acids and derivatives	1596-67-4	HMDB0000667	-
M201T306_NEG	1-aminocyclopropanecarboxylic acid	5.097	201.086	21733.9	Carboxylic acids and derivatives	22059-21-8	HMDB0036458	C01234
M261T451_POS	Glu-Leu	7.524	261.142	22075.3	Carboxylic acids and derivatives	5969-52-8	HMDB0028823	-
M162T380_NEG	4-hydroxy-l-glutamic acid	6.328	162.065	22243.5	Carboxylic acids and derivatives	2485-33-8	HMDB0002273	-
M196T338_NEG	N-acetylhistidine	5.633	196.071	22436.8	Carboxylic acids and derivatives	2497-02-01	HMDB0032055	-
M260T542_POS	Lys-Leu	9.037	260.196	23397.9	Carboxylic acids and derivatives	7369-79-1	HMDB0028955	-
M299T431_POS	Pemetrexed	7.186	299.123	23578.1	Carboxylic acids and derivatives	150399-23-8	HMDB0014780	-
M253T343_NEG	Val-His	5.717	253.128	23707.1	Carboxylic acids and derivatives	13589-07-6	HMDB0029129	-
M88T425_NEG	L-Alanine	7.088	88.0396	23850.7	Carboxylic acids and derivatives	302-72-7	HMDB0062251	C00041
M182T237_NEG	L-homocysteic acid	3.944	182.012	24000	Carboxylic acids and derivatives	14857-77-3	HMDB0002205	C16511
M172T407_POS	Captopril	6.781	172.059	24037	Carboxylic acids and derivatives	62571-86-2	HMDB0015328	-
M390T373_NEG	Dicloxacillin	6.209	390.041	24131.5	Carboxylic acids and derivatives	3116-76-5	HMDB0014628	-
M230T339_NEG	Val-Asn	5.644	230.113	25031.1	Carboxylic acids and derivatives	66170-00-1	HMDB0029122	-
M378T432_NEG	S-lactoylglutathione	7.196	378.081	25467.8	Carboxylic acids and derivatives	25138-66-3	HMDB0001066	C03451
M261T252_2_NEG	Phe-pro	4.197	261.122	26891.8	Carboxylic acids and derivatives	7669-65-0	HMDB0011177	-
M311T396_POS	.alpha.-L-Glu-L-Tyr	6.603	311.122	26985	Carboxylic acids and derivatives	3422-39-7	HMDB0028831	-
M158T386_POS	Homostachydrine	6.432	158.116	27490	Carboxylic acids and derivatives	472-22-0	HMDB0033433	-
M216T471_NEG	Lys-Ala	7.845	216.133	27515.2	Carboxylic acids and derivatives	17043-71-9	HMDB0028944	-
M241T384_NEG	Ser-His	6.393	241.116	27603.4	Carboxylic acids and derivatives	67726-09-4	HMDB0029041	-
M369T539_POS	Perindopril	8.984	369.247	28252.3	Carboxylic acids and derivatives	107133-36-8	HMDB0014928	-
M208T209_POS	N-acetyl-l-phenylalanine	3.487	208.095	28419.9	Carboxylic acids and derivatives	2018-61-3	HMDB0000512	C03519
M198T404_NEG	O-phospho-l-homoserine	6.728	198.039	28955.6	Carboxylic acids and derivatives	4210-66-6	HMDB0003484	C01102
M154T449_NEG	L-Histidine	7.475	154.061	29742.8	Carboxylic acids and derivatives	71-00-1	HMDB0000177	C00135
M271T474_NEG	Argininosuccinic acid	7.899	271.103	29781.9	Carboxylic acids and derivatives	2387-71-5	HMDB0000052	C03406
M130T364_NEG	Hydroxyproline	6.071	130.05	31625.6	Carboxylic acids and derivatives	618-27-9	HMDB0240251	C01157
M174T418_NEG	N-acetyl-l-aspartic acid	6.966	174.039	31975.1	Carboxylic acids and derivatives	997-55-7	HMDB0000812	C01042
M277T484_POS	Gamma-l-glutamyl-l-glutamic acid	8.072	277.101	32210.6	Carboxylic acids and derivatives	1116-22-9	HMDB0011737	-
M104T395_NEG	DL-serine	6.578	104.034	32911.4	Carboxylic acids and derivatives	312-84-5	HMDB0003406	C00740
M302T296_NEG	Val-Trp	4.93	302.169	32937.9	Carboxylic acids and derivatives	24587-37-9	HMDB0029138	-
M283T412_NEG	Glu-His	6.869	283.128	33804.4	Carboxylic acids and derivatives	21435-29-0	HMDB0028821	-
M180T39_POS	.gamma.-aminobutyric acid	0.653	180.1	33909.6	Carboxylic acids and derivatives	1956-12-02	HMDB0000112	C00334
M176T306_NEG	N-formylmethionine	5.108	176.055	35187.1	Carboxylic acids and derivatives	4289-98-9	HMDB0001015	C03145
M279T243_NEG	Val-Tyr	4.054	279.132	36319.6	Carboxylic acids and derivatives	3061-91-4	HMDB0029139	-
M146T462_POS	4-Guanidinobutyric acid	7.696	146.091	36962.9	Carboxylic acids and derivatives	463-00-3	HMDB0003464	C01035
M174T217_POS	Acetyl-dl-leucine	3.618	174.11	37888.7	Carboxylic acids and derivatives	1188-21-2	HMDB0011756	-
M257T176_POS	Gln-gln	2.935	257.112	38139.4	Carboxylic acids and derivatives	54419-93-1	HMDB0028795	-
M106T233_POS	DL-serine	3.879	106.027	39143.6	Carboxylic acids and derivatives	312-84-5	HMDB0003406	C00740
M189T410_POS	N-alpha-acetyl-l-lysine	6.825	189.123	39548.5	Carboxylic acids and derivatives	1946-82-3	HMDB0000446	-
M518T138_POS	Orlistat	2.294	518.38	39869.8	Carboxylic acids and derivatives	96829-58-2	HMDB0015215	-
M154T399_NEG	Histidine	6.658	154.061	39955	Carboxylic acids and derivatives	71-00-1	HMDB0000177	-
M473T425_1_NEG	Chicoric acid	7.088	473.085	40610.7	Carboxylic acids and derivatives	52248-48-3	HMDB0033938	-
M272T434_POS	Arg-Pro	7.241	272.171	42174.6	Carboxylic acids and derivatives	2418-69-1	HMDB0028717	-
M118T393_NEG	L-Threonine	6.557	118.05	42254	Carboxylic acids and derivatives	72-19-5	HMDB0000167	C00188
M316T267_NEG	Nateglinide	4.449	316.185	42762.4	Carboxylic acids and derivatives	105816-04-4	HMDB0014869	-
M273T474_POS	Argininosuccinic acid	7.896	273.118	42843.5	Carboxylic acids and derivatives	2387-71-5	HMDB0000052	C03406
M257T413_1_NEG	L-saccharopine	6.879	257.11	43180.5	Carboxylic acids and derivatives	997-68-2	HMDB0000279	C00449
M227T270_NEG	Leu-Pro	4.504	227.138	43248.1	Carboxylic acids and derivatives	6403-35-6	HMDB0011175	-
M119T314_POS	Methylmalonic acid	5.232	119.048	43723.2	Carboxylic acids and derivatives	516-05-2	HMDB0000202	C02170
M320T275_NEG	Arg-phe	4.591	320.158	43882.9	Carboxylic acids and derivatives	2047-13-4	HMDB0028716	-
M276T457_POS	Gamma-glu-glu	7.612	276.117	44121	Carboxylic acids and derivatives	1116-22-9	HMDB0011737	-
M219T364_NEG	Ser-Asp	6.06	219.04	44709.6	Carboxylic acids and derivatives	2543-31-9	HMDB0029035	-
M192T208_NEG	Phenaceturic acid	3.469	192.066	46914.8	Carboxylic acids and derivatives	500-98-1	HMDB0000821	C05598
M593T436_POS	Pantethine	7.274	593.189	47102	Carboxylic acids and derivatives	16816-67-4	HMDB0003828	-
M185T344_NEG	Ala-Pro	5.74	185.092	47313.3	Carboxylic acids and derivatives	13485-59-1	HMDB0028695	-
M562T121_NEG	Fosinopril	2.018	562.296	49194.4	Carboxylic acids and derivatives	98048-97-6	HMDB0014635	-
M147T391_POS	Glutamine	6.518	147.075	49631	Carboxylic acids and derivatives	5959-95-5	HMDB0003423	-
M219T294_POS	Val-Thr	4.899	219.133	49794	Carboxylic acids and derivatives	72636-02-3	HMDB0029137	-
M281T384_NEG	Thr-Tyr	6.393	281.108	51583.9	Carboxylic acids and derivatives	145295-02-9	HMDB0029073	-
M263T253_POS	Phe-pro	4.214	263.138	52116.6	Carboxylic acids and derivatives	7669-65-0	HMDB0011177	-
M397T367_NEG	Clavulanic acid	6.124	397.088	55087.1	Carboxylic acids and derivatives	58001-44-8	HMDB0014904	C06662
M190T226_NEG	N-acetyl-l-methionine	3.769	190.053	55521.9	Carboxylic acids and derivatives	65-82-7	HMDB0011745	-
M286T271_NEG	Arg-Leu	4.515	286.174	58473.3	Carboxylic acids and derivatives	1188-24-5	HMDB0028713	-
M308T229_NEG	Gln-tyr	3.824	308.126	59573	Carboxylic acids and derivatives	457662-02-1	HMDB0028809	-
M198T413_POS	3,4-dihydroxy-l-phenylalanine	6.879	198.051	59742.9	Carboxylic acids and derivatives	59-92-7	HMDB0000181	C00355
M259T431_POS	L-saccharopine	7.175	259.127	60706.4	Carboxylic acids and derivatives	997-68-2	HMDB0000279	C00449
M229T259_POS	Ile-Pro	4.312	229.153	60711.2	Carboxylic acids and derivatives	37462-92-3	HMDB0011174	-
M130T446_POS	L-Pyroglutamic acid	7.437	130.048	61044.3	Carboxylic acids and derivatives	98-79-3	HMDB0000267	C01879
M122T238_NEG	Nicotinate	3.966	122.024	61764.2	Carboxylic acids and derivatives	583-08-4	HMDB0003269	C00253
M288T303_NEG	Ophthalmate	5.052	288.106	62529.9	Carboxylic acids and derivatives	495-27-2	HMDB0005765	C21016
M227T439_POS	Glu-Pro	7.317	227.101	63679.1	Carboxylic acids and derivatives	41745-47-5	HMDB0028827	-
M190T383_POS	L-homocitrulline	6.378	190.142	65104.8	Carboxylic acids and derivatives	1190-49-4	HMDB0000679	-
M132T425_NEG	Aspartic acid	7.077	132.029	65135.1	Carboxylic acids and derivatives	1783-96-6	HMDB0006483	-
M258T393_NEG	Lys-Ile	6.557	258.179	66285.2	Carboxylic acids and derivatives	20556-13-2	HMDB0028954	-
M174T364_NEG	Guanidinosuccinic acid	6.06	174.076	66510.5	Carboxylic acids and derivatives	6133-30-8	HMDB0003157	-
M175T383_POS	L-theanine	6.389	175.106	66903.3	Carboxylic acids and derivatives	3081-61-6	HMDB0034365	-
M288T381_2_POS	Arg-Leu	6.346	288.202	67860.8	Carboxylic acids and derivatives	1188-24-5	HMDB0028713	-
M164T369_POS	Acetylcysteine	6.152	164.028	70236.4	Carboxylic acids and derivatives	616-91-1	HMDB0001890	-
M247T404_POS	Val-Glu	6.739	247.128	71262	Carboxylic acids and derivatives	3062-07-05	HMDB0029126	-
M145T574_NEG	L-Lysine	9.57	145.098	71865.6	Carboxylic acids and derivatives	10098-89-2	HMDB0301757	C00047
M201T531_NEG	Ng,ng-dimethyl-l-arginine	8.854	201.134	73915.3	Carboxylic acids and derivatives	30315-93-6	HMDB0001539	-
M90T363_POS	Alanine	6.046	90.0539	74122.4	Carboxylic acids and derivatives	302-72-7	HMDB0062251	C01401
M426T471_NEG	Pemetrexed	7.845	426.157	75370.3	Carboxylic acids and derivatives	150399-23-8	HMDB0014780	-
M327T133_POS	N-acetylaspartylglutamic acid	2.218	327.066	75398.1	Carboxylic acids and derivatives	3106-85-2	HMDB0001067	C12270
M702T183_NEG	Fumonisin b1	3.042	702.36	79750.5	Carboxylic acids and derivatives	116355-83-0	HMDB0034702	-
M228T513_NEG	Ergothioneine	8.549	228.097	79812.2	Carboxylic acids and derivatives	497-30-3	HMDB0003045	C05570
M263T225_NEG	Phenylacetyl-l-glutamine	3.747	263.102	80250.9	Carboxylic acids and derivatives	28047-15-6	HMDB0006344	C04148
M187T303_NEG	N-acetylglutamine	5.052	187.071	82534.7	Carboxylic acids and derivatives	2490-97-3	HMDB0006029	-
M187T365_NEG	N.epsilon.-acetyl-l-lysine	6.081	187.107	83974.1	Carboxylic acids and derivatives	692-04-6	HMDB0000206	C02727
M146T375_POS	G-guanidinobutyrate	6.249	146.091	84404.3	Carboxylic acids and derivatives	463-00-3	HMDB0003464	C01035
M235T255_NEG	Ala-phe	4.251	235.107	84904.3	Carboxylic acids and derivatives	3061-90-3	HMDB0028694	-
M246T421_POS	Val-Lys	7.01	246.18	89627.5	Carboxylic acids and derivatives	22677-62-9	HMDB0029132	-
M423T31_NEG	Benazepril	0.511	423.179	93435.8	Carboxylic acids and derivatives	86541-75-5	HMDB0014682	-
M104T56_POS	Dimethylglycine	0.941	104.069	94927.5	Carboxylic acids and derivatives	1118-68-9	HMDB0000092	C01026
M120T373_POS	L-threonine	6.217	120.065	95449.1	Carboxylic acids and derivatives	72-19-5	HMDB0000167	C00188
M173T310_NEG	L-theanine	5.163	173.092	95495	Carboxylic acids and derivatives	3081-61-6	HMDB0034365	-
M130T390_POS	D-glutamine	6.507	130.048	100532	Carboxylic acids and derivatives	5959-95-5	HMDB0003423	C00819
M116T300_NEG	Guanidoacetic acid	4.996	116.034	101128	Carboxylic acids and derivatives	352-97-6	HMDB0000128	C00581
M312T260_NEG	Alitame	4.327	312.154	106987	Carboxylic acids and derivatives	80863-62-3	HMDB0037324	-
M274T420_POS	Arg-Val	6.999	274.186	107007	Carboxylic acids and derivatives	2896-20-0	HMDB0028722	-
M218T470_POS	Ala-Lys	7.831	218.148	109759	Carboxylic acids and derivatives	6366-77-4	HMDB0028692	-
M174T430_NEG	L-citrulline	7.175	174.075	110014	Carboxylic acids and derivatives	372-75-8	HMDB0000904	C00327
M180T343_NEG	L-Tyrosine	5.712	180.065	111742	Carboxylic acids and derivatives	60-18-4	HMDB0000158	C00082
M145T381_NEG	Glutamine	6.356	145.061	115271	Carboxylic acids and derivatives	5959-95-5	HMDB0003423	-
M276T88_NEG	Gln-met	1.472	276.089	119900	Carboxylic acids and derivatives	114659-59-5	HMDB0028803	-
M156T419_POS	Histidine	6.977	156.076	120757	Carboxylic acids and derivatives	71-00-1	HMDB0000177	-
M596T193_POS	Indinavir	3.21	596.366	121640	Carboxylic acids and derivatives	150378-17-9	HMDB0014369	C07051
M143T339_POS	Ectoine	5.652	143.081	122607	Carboxylic acids and derivatives	96702-03-3	HMDB0240650	C06231
M244T303_NEG	Ala-Arg	5.052	244.128	125635	Carboxylic acids and derivatives	16709-12-9	HMDB0028681	-
M215T235_NEG	Val-Val	3.922	215.139	127750	Carboxylic acids and derivatives	3918-94-3	HMDB0029140	-
M188T223_NEG	Asn-Gly	3.724	188.092	128436	Carboxylic acids and derivatives	67576-72-1	HMDB0028731	-
M244T155_NEG	Asn-Ile	2.591	244.154	132930	Carboxylic acids and derivatives	438533-59-6	HMDB0028734	-
M619T373_POS	Auranofin	6.217	619.104	134690	Carboxylic acids and derivatives	34031-32-8	HMDB0015130	-
M331T425_NEG	Zanamivir	7.088	331.112	139822	Carboxylic acids and derivatives	139110-80-8	HMDB0014698	-
M191T513_NEG	Citrate	8.549	191.019	141976	Carboxylic acids and derivatives	77-92-9	HMDB0000094	C00158
M274T61_NEG	Ala-Trp	1.02	274.109	146417	Carboxylic acids and derivatives	16305-75-2	HMDB0013209	-
M147T578_POS	D-Pipecolinic acid	9.635	147.111	147110	Carboxylic acids and derivatives	1723-00-8	HMDB0005960	-
M246T459_POS	Arg-Ala	7.644	246.155	155526	Carboxylic acids and derivatives	40968-45-4	HMDB0028702	-
M318T401_NEG	N-(phenylacetyl)-l-phenylalanine	6.685	318.093	155760	Carboxylic acids and derivatives	738-75-0	HMDB0002372	-
M292T340_NEG	Domoic acid	5.665	292.138	162652	Carboxylic acids and derivatives	14277-97-5	HMDB0033939	-
M114T181_POS	Creatinine	3.022	114.065	164867	Carboxylic acids and derivatives	60-27-5	HMDB0000562	C00791
M172T223_NEG	Acetyl-dl-leucine	3.713	172.097	167222	Carboxylic acids and derivatives	1188-21-2	HMDB0011756	-
M102T395_NEG	Dimethylglycine	6.589	102.056	169432	Carboxylic acids and derivatives	1118-68-9	HMDB0000092	C01026
M277T217_NEG	Pantetheine	3.613	277.118	170500	Carboxylic acids and derivatives	496-65-1	HMDB0003426	C00831
M293T98_NEG	Aspartame	1.637	293.115	176814	Carboxylic acids and derivatives	22839-47-0	HMDB0001894	C11045
M219T432_POS	5-L-Glutamyl-L-alanine	7.197	219.096	177042	Carboxylic acids and derivatives	5875-41-2	HMDB0006248	C03740
M166T388_POS	Methionine sulfoxide	6.464	166.052	177112	Carboxylic acids and derivatives	3226-65-1	HMDB0002005	C02989
M124T238_POS	Nicotinate	3.964	124.038	177206	Carboxylic acids and derivatives	583-08-4	HMDB0003269	C00253
M154T158_POS	N-acetylhistamine	2.639	154.096	178742	Carboxylic acids and derivatives	673-49-4	HMDB0013253	C05135
M340T43_POS	N-oleoylglycine	0.718	340.283	181139	Carboxylic acids and derivatives	2601-90-3	HMDB0013631	-
M249T124_NEG	Gamma-Glu-Cys	2.073	249.053	181958	Carboxylic acids and derivatives	636-58-8	HMDB0001049	C00669
M144T237_NEG	4-acetamidobutanoate	3.955	144.066	189684	Carboxylic acids and derivatives	3025-96-5	HMDB0003681	C02946
M173T283_NEG	Hexanoylglycine	4.718	173.103	198413	Carboxylic acids and derivatives	24003-67-6	HMDB0000701	-
M164T392_NEG	Methionine sulfoxide	6.536	164.037	199123	Carboxylic acids and derivatives	3226-65-1	HMDB0002005	C02989
M257T419_NEG	Gamma-l-glutamyl-l-glutamic acid	6.989	257.076	204134	Carboxylic acids and derivatives	1116-22-9	HMDB0011737	-
M259T369_NEG	Asn-Gln	6.145	259.09	217987	Carboxylic acids and derivatives	14608-83-4	HMDB0028729	-
M162T379_POS	N-methyl-l-glutamic acid	6.324	162.075	228413	Carboxylic acids and derivatives	35989-16-3	HMDB0062660	C01046
M415T37_NEG	Ramipril	0.62	415.246	231193	Carboxylic acids and derivatives	87333-19-5	HMDB0014324	-
M314T127_2_POS	N-palmitoylglycine	2.119	314.267	234545	Carboxylic acids and derivatives	158305-64-7	HMDB0013034	-
M303T62_1_NEG	N-acetylaspartylglutamic acid	1.031	303.063	241490	Carboxylic acids and derivatives	3106-85-2	HMDB0001067	C12270
M229T443_POS	Pro-hyp	7.382	229.117	245310	Carboxylic acids and derivatives	18684-24-7	HMDB0006695	-
M164T74_POS	Ala-Phe	1.241	164.092	245634	Carboxylic acids and derivatives	3061-90-3	HMDB0028694	-
M102T419_POS	1-aminocyclopropanecarboxylic acid	6.988	102.054	256523	Carboxylic acids and derivatives	22059-21-8	HMDB0036458	C01234
M417T400_POS	Ramipril	6.665	417.233	263839	Carboxylic acids and derivatives	87333-19-5	HMDB0014324	-
M187T123_POS	Ala-Pro	2.042	187.108	272051	Carboxylic acids and derivatives	13485-59-1	HMDB0028695	-
M272T63_NEG	Glutathione, oxidized	1.042	272.094	274950	Carboxylic acids and derivatives	15718-51-1	HMDB0011691	C00127
M566T154_NEG	Nelfinavir	2.569	566.285	308930	Carboxylic acids and derivatives	159989-64-7	HMDB0014365	-
M243T106_POS	His-ser	1.766	243.096	312434	Carboxylic acids and derivatives	21438-60-8	HMDB0028894	C00214
M116T381_NEG	L-Valine	6.349	116.071	314797	Carboxylic acids and derivatives	72-18-4	HMDB0000883	C00183
M188T407_NEG	N-acetyl-l-glutamate	6.782	188.056	320027	Carboxylic acids and derivatives	1188-37-0	HMDB0001138	C00624
M206T209_NEG	N-acetyl-l-phenylalanine	3.491	206.082	320949	Carboxylic acids and derivatives	2018-61-3	HMDB0000512	C03519
M310T120_POS	Dicyclomine	1.998	310.274	327839	Carboxylic acids and derivatives	77-19-0	HMDB0014942	-
M109T55_POS	3-methyl-l-histidine	0.919	109.075	341946	Carboxylic acids and derivatives	368-16-1	HMDB0000479	C01152
M158T200_POS	Trans-4-(aminomethyl)cyclohexanecarboxylic acid	3.326	158.116	346834	Carboxylic acids and derivatives	1197-18-8	HMDB0014447	-
M216T382_NEG	Captopril	6.371	216.087	349053	Carboxylic acids and derivatives	62571-86-2	HMDB0015328	-
M116T381_POS	D-proline	6.352	116.07	350516	Carboxylic acids and derivatives	344-25-2	HMDB0003411	C00763
M221T275_POS	Prilocaine	4.58	221.185	354912	Carboxylic acids and derivatives	721-50-6	HMDB0014888	-
M319T425_POS	His-Tyr	7.087	319.112	356582	Carboxylic acids and derivatives	35979-00-1	HMDB0028897	-
M210T134_NEG	Phosphocreatine	2.239	210.043	389928	Carboxylic acids and derivatives	1967-07-02	HMDB0001511	C02305
M404T61_NEG	Lisinopril	1.02	404.244	394829	Carboxylic acids and derivatives	83915-83-7	HMDB0001938	-
M222T86_NEG	N-Acetyl-L-tyrosine	1.439	222.079	406158	Carboxylic acids and derivatives	537-55-3	HMDB0000866	-
M239T223_POS	L-homoserine	3.716	239.106	462240	Carboxylic acids and derivatives	672-15-1	HMDB0000719	C00263
M88T365_NEG	Alanine	6.081	88.0401	471410	Carboxylic acids and derivatives	302-72-7	HMDB0062251	C01401
M116T315_NEG	Valine	5.249	116.072	476821	Carboxylic acids and derivatives	72-18-4	HMDB0000883	-
M201T286_NEG	Ala-Ile	4.767	201.123	569536	Carboxylic acids and derivatives	29727-65-9	HMDB0028690	-
M131T539_NEG	D-ornithine	8.983	131.081	576172	Carboxylic acids and derivatives	348-66-3	HMDB0003374	C00515
M132T273_POS	Leucine	4.549	132.101	619777	Carboxylic acids and derivatives	61-90-5	HMDB0000687	-
M262T516_POS	.alpha.-L-Asp-L-Lys	8.596	262.138	655663	Carboxylic acids and derivatives	5891-51-0	HMDB0004987	-
M150T300_2_POS	L-methionine	4.995	150.058	665538	Carboxylic acids and derivatives	59-51-8	HMDB0033951	C00073
M217T294_1_NEG	Ser-Ile	4.896	217.119	698947	Carboxylic acids and derivatives	91086-51-0	HMDB0029042	-
M128T320_NEG	L-pyroglutamic acid	5.33	128.034	722798	Carboxylic acids and derivatives	98-79-3	HMDB0000267	C01879
M377T105_NEG	L-homocitrulline	1.757	377.229	757787	Carboxylic acids and derivatives	1190-49-4	HMDB0000679	-
M160T312_POS	Betonicine	5.199	160.096	842755	Carboxylic acids and derivatives	515-25-3	HMDB0029412	-
M148T298_2_NEG	L-methionine	4.963	148.043	856768	Carboxylic acids and derivatives	59-51-8	HMDB0033951	C00073
M130T542_POS	Lysine	9.037	130.085	897276	Carboxylic acids and derivatives	10098-89-2	HMDB0301757	-
M114T325_2_NEG	D-proline	5.425	114.056	902864	Carboxylic acids and derivatives	344-25-2	HMDB0003411	C00763
M117T410_2_NEG	Methylmalonic acid	6.826	117.02	980124	Carboxylic acids and derivatives	516-05-2	HMDB0000202	C02170
M267T183_NEG	DL-Homocystine	3.042	267.072	1.01262e+06	Carboxylic acids and derivatives	870-93-9	HMDB0000575	C01817
M187T288_NEG	Val-Ala	4.799	187.108	1.03963e+06	Carboxylic acids and derivatives	27493-61-4	HMDB0029120	-
M199T362_NEG	5-L-Glutamyl-L-alanine	6.028	199.069	1.25711e+06	Carboxylic acids and derivatives	5875-41-2	HMDB0006248	C03740
M145T551_NEG	Lysine	9.177	145.097	1.36597e+06	Carboxylic acids and derivatives	10098-89-2	HMDB0301757	-
M144T275_POS	Stachydrine	4.58	144.101	1.39273e+06	Carboxylic acids and derivatives	471-87-4	HMDB0004827	-
M132T179_2_POS	Creatine	2.991	132.102	1.54014e+06	Carboxylic acids and derivatives	57-00-1	HMDB0000064	C00300
M241T107_NEG	His-ser	1.779	241.081	1.5609e+06	Carboxylic acids and derivatives	21438-60-8	HMDB0028894	C00214
M100T61_2_POS	5-aminovaleric acid	1.019	100.075	1.61528e+06	Carboxylic acids and derivatives	660-88-8	HMDB0003355	C00431
M227T124_NEG	Ile-Pro	2.062	227.065	2.36079e+06	Carboxylic acids and derivatives	37462-92-3	HMDB0011174	C00526
M189T542_POS	N6,N6,N6-Trimethyl-L-lysine	9.037	189.159	2.43728e+06	Carboxylic acids and derivatives	19253-88-4	HMDB0001325	C03793
M176T392_2_POS	L-citrulline	6.54	176.128	3.38862e+06	Carboxylic acids and derivatives	372-75-8	HMDB0000904	C00327
M307T123_POS	Glutathione, oxidized	2.053	307.1	4.06296e+06	Carboxylic acids and derivatives	15718-51-1	HMDB0011691	C00127
M130T276_NEG	Leucine	4.606	130.088	5.29738e+06	Carboxylic acids and derivatives	61-90-5	HMDB0000687	-
M286T372_NEG	Cefaclor	6.193	286.059	6.31874e+06	Carboxylic acids and derivatives	53994-73-3	HMDB0014971	-
M203T530_POS	Ng,ng-dimethyl-l-arginine	8.833	203.15	7.96844e+06	Carboxylic acids and derivatives	30315-93-6	HMDB0001539	-
M266T431_POS	Domoic acid	7.175	266.124	8.59142e+06	Carboxylic acids and derivatives	14277-97-5	HMDB0033939	-
M542T198_2_POS	Vinblastine	3.305	542.325	1.01379e+07	Carboxylic acids and derivatives	865-21-4	HMDB0014710	C07201
M235T278_POS	Betaine	4.631	235.167	2.0809e+07	Carboxylic acids and derivatives（羧酸及其衍生物）	6915-17-9	HMDB0000043	C00719
M340T309_POS	Piperlongumine	5.146	340.123	31939.5	Cinnamic acids and derivatives	20069-09-4	HMDB0030341	-
M293T152_NEG	Caftaric acid	2.536	293.053	43244.2	Cinnamic acids and derivatives	67879-58-7	HMDB0013680	-
M147T314_POS	P-coumaric acid	5.232	147.043	45206.2	Cinnamic acids and derivatives	4501-31-9	HMDB0030677	C00811
M225T260_POS	3,5-dimethoxy-4-hydroxycinnamic acid	4.334	225.085	50911.7	Cinnamic acids and derivatives	7361-90-2	HMDB0034069	C00482
M163T217_NEG	Trans-2-hydroxycinnamic acid	3.624	163.006	66280.5	Cinnamic acids and derivatives	614-60-8	HMDB0002641	C01772
M149T268_POS	Trans-cinnamic acid	4.475	149.058	81598.5	Cinnamic acids and derivatives	140-10-3	HMDB0000930	C00423
M165T312_POS	trans-2-Hydroxycinnamic acid	5.197	165.052	304472	Cinnamic acids and derivatives	614-60-8	HMDB0002641	C01772
M147T269_2_NEG	trans-cinnamate	4.482	147.045	676316	Cinnamic acids and derivatives	140-10-3	HMDB0000930	C00423
M264T88_NEG	Nitecapone	1.472	264.053	716119	Cinnamic acids and derivatives	116313-94-1	HMDB0041949	-
M223T351_NEG	3,5-dimethoxy-4-hydroxycinnamic acid	5.847	223.018	867524	Cinnamic acids and derivatives	7361-90-2	HMDB0034069	C00482
M316T400_NEG	Piperlongumine	6.674	316.116	1.51727e+06	Cinnamic acids and derivatives	20069-09-4	HMDB0030341	-
M405T355_POS	Bergaptol	5.918	405.07	13422.5	Coumarins and derivatives	486-60-2	HMDB0013679	C00758
M269T370_POS	Isopimpinellin	6.174	269.038	17413.8	Coumarins and derivatives	482-27-9	HMDB0034312	C02162
M355T299_NEG	Rutamarin	4.985	355.158	17561.5	Coumarins and derivatives	14882-94-1	HMDB0030666	-
M309T419_POS	Warfarin	6.977	309.127	19453.7	Coumarins and derivatives	81-81-2	HMDB0001935	-
M205T290_NEG	6,7-dimethylesculetin	4.842	205.063	36577.3	Coumarins and derivatives	120-08-1	HMDB0030818	-
M115T172_POS	Psoralen	2.869	115.074	47657.5	Coumarins and derivatives	66-97-7	HMDB0034272	C09305
M329T377_POS	Aflatoxin g1	6.281	329.056	128558	Coumarins and derivatives	6795-23-9	HMDB0030479	C16755
M177T360_POS	7-methoxycoumarin	5.992	177.062	135578	Coumarins and derivatives	531-59-9	HMDB0029758	-
M269T325_NEG	Imperatorin	5.415	269.089	141699	Coumarins and derivatives	482-44-0	HMDB0034376	-
M339T171_NEG	Esculin	2.854	339.048	575707	Coumarins and derivatives	531-75-9	HMDB0030820	-
M391T300_POS	Curcumin	5.006	391.133	13916	Diarylheptanoids	458-37-7	HMDB0002269	C10443
M307T390_NEG	Bisdemethoxycurcumin	6.502	307.112	14823.2	Diarylheptanoids	24939-16-0	HMDB0002114	C17743
M187T262_2_NEG	Demethoxycurcumin	4.371	187.041	98922.4	Diarylheptanoids	22608-11-3	HMDB0033801	C17742
M382T321_NEG	Prazosin	5.352	382.131	13195.9	Diazinanes	19216-56-9	HMDB0014600	-
M532T252_POS	Terconazole	4.203	532.199	18656.3	Diazinanes	67915-31-5	HMDB0014396	-
M384T517_POS	Prazosin	8.617	384.183	23385.2	Diazinanes	19216-56-9	HMDB0014600	-
M605T259_NEG	Pipemidic acid	4.316	605.268	23529.9	Diazinanes	51940-44-4	HMDB0041989	-
M372T423_POS	Trazodona	7.054	372.14	26287.8	Diazinanes	19794-93-5	HMDB0014794	-
M386T53_POS	Buspirone	0.886	386.233	93608.2	Diazinanes	36505-84-7	HMDB0014633	-
M550T299_NEG	Bosentan	4.985	550.184	12172.3	Diazines	147536-97-8	HMDB0014699	-
M367T360_1_POS	Thiamine monophosphate	5.992	367.042	14687.6	Diazines	495-23-8	HMDB0002666	C01081
M264T259_POS	Zaleplon	4.323	264.107	21666.8	Diazines	151319-34-5	HMDB0015097	-
M343T163_NEG	Thiamin monophosphate	2.711	343.016	33555.4	Diazines	495-23-8	HMDB0002666	C01081
M206T225_POS	Moxonidine	3.748	206.101	33766	Diazines	75438-57-2	HMDB0041938	-
M251T154_POS	5-methylcytosine	2.573	251.149	53852	Diazines	554-01-8	HMDB0002894	C02376
M209T108_NEG	Aprobarbital	1.801	209.117	59797.1	Diazines	1977-02-01	HMDB0015441	-
M418T453_NEG	Rosuvastatin	7.554	418.143	74720.8	Diazines	287714-41-4	HMDB0015230	-
M125T81_NEG	Thymine	1.35	125.035	149272	Diazines	65-71-4	HMDB0000262	C00178
M112T220_POS	Cytosine	3.672	112.049	151943	Diazines	71-30-7	HMDB0000630	C00380
M111T96_NEG	Uracil	1.593	111.019	162996	Diazines	66-22-8	HMDB0000300	C00106
M227T46_POS	Amobarbital	0.774	227.138	172250	Diazines	57-43-2	HMDB0015440	-
M113T93_POS	Uracil	1.552	113.033	206000	Diazines	66-22-8	HMDB0000300	C00106
M235T265_NEG	Cidofovir	4.415	235.039	628329	Diazines	113852-37-2	HMDB0014513	-
M127T106_POS	Thymine	1.766	127.049	1.06355e+06	Diazines	65-71-4	HMDB0000262	C00178
M241T241_NEG	Thiopental	4.021	241.119	1.57808e+06	Diazines	76-75-5	HMDB0014737	C07521
M687T413_NEG	Maltitol	6.879	687.241	10261.8	Fatty Acyls	585-88-6	HMDB0002928	-
M295T290_NEG	Mevalonic acid	4.831	295.148	12217.5	Fatty Acyls	17817-88-8	HMDB0000227	C00418
M241T43_NEG	Pentadecanoic acid	0.718	241.215	14594.5	Fatty Acyls	1002-84-2	HMDB0000826	-
M175T304_NEG	2-Isopropylmalic acid	5.063	175.06	15403.8	Fatty Acyls	49601-06-1	HMDB0000402	C02504
M335T172_POS	Arachidic acid	2.869	335.305	15891.1	Fatty Acyls	506-30-9	HMDB0002212	C06425
M246T156_POS	2-Methylbutyroylcarnitine	2.595	246.169	16376	Fatty Acyls	31023-25-3	HMDB0000378	-
M187T29_NEG	Azelaic acid	0.489	187.005	16988	Fatty Acyls	123-99-9	HMDB0000784	-
M263T242_POS	9e,11e-octadecadienoic acid	4.028	263.232	19694.6	Fatty Acyls	1839-11-8	HMDB0005047	-
M372T183_POS	Myristoyl-l-carnitine	3.056	372.31	26409.6	Fatty Acyls	25597-07-3	HMDB0005066	-
M369T166_POS	Lignoceric acid	2.76	369.357	27329.4	Fatty Acyls	557-59-5	HMDB0002003	C08320
M443T171_POS	Ascorbyl stearate	2.848	443.289	29249.1	Fatty Acyls	10605-09-1	HMDB0038242	-
M365T168_2_POS	Heneicosanoic acid	2.804	365.35	30295.6	Fatty Acyls	2363-71-5	HMDB0002345	-
M269T46_NEG	Heptadecanoic acid	0.772	269.246	30678.1	Fatty Acyls	3546-17-6	HMDB0006497	-
M739T35_NEG	Thromboxane b2	0.587	739.479	31148.3	Fatty Acyls	54397-85-2	HMDB0003252	C05963
M263T270_POS	12s-hydroxy-5z,8e,10e-heptadecatrienoic acid	4.506	263.195	32415.1	Fatty Acyls	54397-84-1	HMDB0012535	-
M295T86_NEG	9(S)-HODE	1.428	295.225	33076.6	Fatty Acyls	73543-67-6	HMDB0004670	C14767
M353T110_POS	PGD2	1.832	353.232	33466.8	Fatty Acyls	41598-07-6	HMDB0001403	C00696
M272T38_POS	16-Hydroxypalmitic acid	0.642	272.257	35374.9	Fatty Acyls	506-13-8	HMDB0006294	C18218
M319T252_POS	Permethrin	4.192	319.117	35877	Fatty Acyls	52645-53-1	HMDB0015604	-
M391T308_POS	Prostaglandin g2	5.135	391.206	37188.6	Fatty Acyls	51982-36-6	HMDB0003235	C05956
M143T187_POS	Dimethyl adipate	3.111	143.08	37826.2	Fatty Acyls	627-93-0	HMDB0041606	-
M161T397_NEG	3-hydroxy-3-methylglutaric acid	6.622	161.044	37949.8	Fatty Acyls	503-49-1	HMDB0000355	-
M271T109_NEG	16-Hydroxypalmitic acid	1.823	271.225	38868.9	Fatty Acyls	506-13-8	HMDB0006294	C18218
M88T46_POS	Butanoic acid	0.774	88.0748	39613.7	Fatty Acyls	107-92-6	HMDB0000039	C00246
M508T324_POS	Deltamethrin	5.402	507.969	41054.7	Fatty Acyls	52918-63-5	HMDB0041866	-
M316T545_POS	Decanoyl-l-carnitine	9.082	316.232	45625.8	Fatty Acyls	1492-27-9	HMDB0000651	-
M473T384_NEG	Suxibuzone	6.404	473.133	45895.8	Fatty Acyls	27470-51-5	HMDB0042019	-
M161T111_POS	5-phenylvaleric acid	1.843	161.095	48678.1	Fatty Acyls	2270-20-4	HMDB0002043	-
M433T168_POS	Latanoprost	2.804	433.278	65897.8	Fatty Acyls	130209-82-4	HMDB0014792	-
M420T242_POS	Esfenvalerate	4.039	420.135	69675.1	Fatty Acyls	51630-58-1	HMDB0031791	-
M349T109_NEG	Prostaglandin d3	1.823	349.198	70760.5	Fatty Acyls	71902-47-1	HMDB0003034	-
M462T466_POS	Leukotriene e4	7.763	462.216	70886.2	Fatty Acyls	75715-89-8	HMDB0002200	C05952
M426T176_POS	Oleoyl-l-carnitine	2.935	426.355	72757.4	Fatty Acyls	38677-66-6	HMDB0005065	-
M131T406_NEG	5-Hydroxyhexanoic acid	6.771	131.081	77616.5	Fatty Acyls	44843-89-2	HMDB0000525	-
M213T144_NEG	Dethiobiotin	2.392	213.111	80149	Fatty Acyls	533-48-2	HMDB0003581	C01909
M377T303_NEG	D-turanose	5.052	377.105	80229	Fatty Acyls	547-25-1	HMDB0011740	-
M139T127_POS	Sebacic acid	2.109	139.122	80392.9	Fatty Acyls	111-20-6	HMDB0000792	-
M227T294_2_NEG	Trans-traumatic acid	4.896	227.138	83226.4	Fatty Acyls	6402-36-4	HMDB0000933	C16308
M301T229_NEG	8s-hydroxy-5z,9e,11z,14z-eicosatetraenoic acid	3.813	301.215	83474.4	Fatty Acyls	98462-03-4	HMDB0004679	C14776
M419T37_NEG	Jasmonic acid	0.62	419.239	87899.5	Fatty Acyls	59366-47-1	HMDB0032797	C08491
M227T55_NEG	Myristic acid	0.921	227.2	90051.2	Fatty Acyls	544-63-8	HMDB0000806	C06424
M279T61_2_POS	Linolenic acid	1.019	279.231	90529.4	Fatty Acyls	463-40-1	HMDB0001388	C06427
M325T412_POS	D-turanose	6.868	325.112	92634.6	Fatty Acyls	547-25-1	HMDB0011740	-
M309T37_NEG	Prostaglandin f2.beta.	0.609	309.22	96878.3	Fatty Acyls	4510-16-1	HMDB0001483	-
M277T63_POS	Stearidonic acid	1.053	277.215	98466.1	Fatty Acyls	20290-75-9	HMDB0006547	C16300
M333T47_NEG	Docosatrienoic acid	0.783	333.276	99350.3	Fatty Acyls	28845-86-5	HMDB0002823	-
M170T247_POS	7-keto-8-aminopelargonic acid	4.115	170.117	100812	Fatty Acyls	682799-71-9	HMDB0240687	C01092
M127T357_NEG	Adipic acid	5.943	127.05	105148	Fatty Acyls	124-04-9	HMDB0000448	C06104
M321T54_POS	20-hydroxyarachidonic acid	0.897	321.241	110431	Fatty Acyls	79551-86-3	HMDB0005998	C14748
M186T200_NEG	7-keto-8-aminopelargonic acid	3.327	186.112	110483	Fatty Acyls	682799-71-9	HMDB0240687	C01092
M441T200_NEG	Ascorbyl stearate	3.327	441.267	112625	Fatty Acyls	10605-09-1	HMDB0038242	-
M157T316_POS	Suberic acid	5.275	157.096	114338	Fatty Acyls	505-48-6	HMDB0000893	-
M319T144_POS	Prostaglandin e1	2.402	319.225	120349	Fatty Acyls	745-65-3	HMDB0001442	-
M355T46_NEG	Prostaglandin f1.alpha.	0.772	355.261	120397	Fatty Acyls	745-62-0	HMDB0002685	-
M165T163_POS	Trans-traumatic acid	2.716	165.138	126876	Fatty Acyls	6402-36-4	HMDB0000933	C16308
M215T191_POS	Dethiobiotin	3.188	215.137	136981	Fatty Acyls	533-48-2	HMDB0003581	C01909
M339T170_POS	Erucic acid	2.826	339.336	155423	Fatty Acyls	112-86-7	HMDB0002068	C08316
M199T138_POS	Undecanedioic acid	2.294	199.143	156948	Fatty Acyls	1852-04-6	HMDB0000888	-
M271T68_NEG	16-hydroxyhexadecanoic acid	1.131	271.225	158945	Fatty Acyls	506-13-8	HMDB0006294	C18218
M603T40_NEG	Eicosapentaenoic acid	0.664	603.435	163005	Fatty Acyls	10417-94-4	HMDB0001999	C06428
M296T121_POS	alpha-Linolenic acid	2.02	296.258	169070	Fatty Acyls	463-40-1	HMDB0001388	C06427
M213T156_2_POS	Dodecanedioic acid	2.595	213.159	174295	Fatty Acyls	6402-36-4	HMDB0000933	-
M288T541_POS	Octanoylcarnitine	9.016	288.227	175588	Fatty Acyls	25243-95-2	HMDB0000791	-
M359T43_NEG	Iloprost	0.718	359.219	188361	Fatty Acyls	78919-13-8	HMDB0015220	-
M438T58_NEG	Leukotriene e4	0.965	438.227	201602	Fatty Acyls	75715-89-8	HMDB0002200	C05952
M211T175_POS	Jasmonic acid	2.924	211.143	220096	Fatty Acyls	59366-47-1	HMDB0032797	C08491
M285T38_POS	Eicosapentaenoic acid	0.63	285.22	229437	Fatty Acyls	10417-94-4	HMDB0001999	C06428
M277T44_2_NEG	.gamma.-linolenic acid	0.74	277.215	239507	Fatty Acyls	506-26-3	HMDB0003073	C06426
M129T227_2_NEG	Citraconic acid	3.78	129.02	306527	Fatty Acyls	498-24-8	HMDB0000749	C02226
M309T46_NEG	Eicosenoic acid	0.772	309.278	332143	Fatty Acyls	135357-25-4	HMDB0033022	C16526
M153T50_POS	Azelaic acid	0.841	153.101	337063	Fatty Acyls	123-99-9	HMDB0000784	-
M295T62_2_NEG	9-hydroxy-10e,12z-octadecadienoic acid	1.031	295.226	367174	Fatty Acyls	98524-19-7	HMDB0062652	-
M317T142_NEG	5(S)-HpETE	2.371	317.209	405286	Fatty Acyls	74581-83-2	HMDB0011135	C05356
M229T176_POS	Traumatic Acid	2.935	229.153	477437	Fatty Acyls	6402-36-4	HMDB0000933	C16308
M299T105_POS	15-Deoxy-delta-12,14-PGJ2	1.754	299.2	570949	Fatty Acyls	87893-55-8	HMDB0005079	C14717
M301T42_POS	17(18)-epoxy-5z,8z,11z,14z-eicosatetraenoic acid	0.697	301.215	775586	Fatty Acyls	131339-23-6	HMDB0010212	-
M360T126_NEG	Prostaglandin e2	2.107	360.251	782506	Fatty Acyls	363-24-6	HMDB0001220	C00584
M281T46_NEG	Oleic acid	0.772	281.246	802210	Fatty Acyls	2027-47-6	HMDB0062703	C00712
M313T136_1_NEG	Geranyl diphosphate	2.261	313.083	863857	Fatty Acyls	68705-63-5	HMDB0032291	C00341
M275T44_NEG	Stearidonic acid	0.729	275.199	876568	Fatty Acyls	20290-75-9	HMDB0006547	C16300
M253T44_NEG	Cis-9-palmitoleic acid	0.729	253.216	1.16751e+06	Fatty Acyls	373-49-9	HMDB0003229	C08362
M157T331_2_NEG	Nonanoic acid	5.518	156.991	1.41241e+06	Fatty Acyls	112-05-0	HMDB0000847	-
M362T53_NEG	N-palmitoyltaurine	0.89	362.232	1.42216e+06	Fatty Acyls	83982-06-3	HMDB0240594	-
M141T351_NEG	Cis,cis-muconic acid	5.847	141.017	3.33971e+06	Fatty Acyls	1119-72-8	HMDB0006331	C02480
M351T149_NEG	5(s),14(r)-lipoxin b4	2.48	351.215	3.7849e+06	Fatty Acyls（脂肪酰基）	98049-69-5	HMDB0005082	C06315
M464T432_NEG	Delphinidin-3-glucoside	7.207	464.102	10061.7	Flavonoids	6906-38-3	HMDB0037997	C12138
M577T426_POS	Poncirin	7.098	577.195	10780	Flavonoids	14941-08-3	HMDB0037487	-
M539T451_POS	Amentoflavone	7.513	539.083	13325.9	Flavonoids	1617-53-4	HMDB0030832	-
M223T261_POS	Flavone	4.356	223.072	16798.5	Flavonoids	525-82-6	HMDB0003075	-
M573T360_POS	Quercetin 3-o-malonylglucoside	6.003	573.067	17540.5	Flavonoids	96862-01-0	HMDB0037368	-
M387T423_NEG	Artemisetin	7.044	387.103	18015.2	Flavonoids	479-90-3	HMDB0030095	-
M445T359_NEG	Baicalin	5.985	445.075	24701.6	Flavonoids	21967-41-9	HMDB0041832	-
M303T174_POS	Hesperetin	2.902	303.1	25122.7	Flavonoids	520-33-2	HMDB0005782	-
M221T316_NEG	Flavone	5.259	221.058	26564.8	Flavonoids	525-82-6	HMDB0003075	-
M612T468_POS	Vicenin 2	7.795	612.176	33395.9	Flavonoids	23666-13-9	HMDB0030708	-
M457T67_NEG	Epigallocatechin gallate	1.119	457.154	34570.8	Flavonoids	989-51-5	HMDB0003153	C09731
M503T316_POS	Myricitrin	5.264	503.06	40639.5	Flavonoids	17912-87-7	HMDB0034360	-
M300T373_NEG	Quercetin 3-glucoside	6.209	300.01	52128.9	Flavonoids	482-35-9	HMDB0037362	C05623
M431T181_POS	Hecogenin	3.024	431.336	59070.9	Flavonoids	115921-09-0	HMDB0038824	C08902
M281T360_NEG	5,7-dimethoxyflavone	6.006	281.07	60054.3	Flavonoids	21392-57-4	HMDB0036620	-
M358T431_NEG	Casticin	7.186	358.077	65964	Flavonoids	479-91-4	HMDB0030660	-
M429T207_2_NEG	Hecogenin	3.447	429.307	70220.2	Flavonoids	115921-09-0	HMDB0038824	C08902
M289T89_NEG	Catechin	1.484	289.048	114730	Flavonoids	154-23-4	HMDB0002780	-
M271T202_NEG	Naringenin	3.37	271.073	139647	Flavonoids	480-41-1	HMDB0002670	C00509
M287T425_NEG	Dihydrokaempferol	7.088	287.123	141498	Flavonoids	480-20-6	HMDB0030847	C00974
M297T179_NEG	Apigenin 7,4'-dimethyl ether	2.986	297.056	260948	Flavonoids	5128-44-9	HMDB0132454	-
M287T315_NEG	Eriodictyol	5.248	286.975	907712	Flavonoids（类黄酮）	552-58-9	HMDB0005810	C05631
M341T465_POS	Matairesinol	7.742	341.13	12048.3	Furanoid lignans	580-72-3	HMDB0035698	C10682
M390T207_POS	Arctigenin	3.443	390.175	15455.6	Furanoid lignans	7770-78-7	HMDB0030087	-
M299T346_POS	Enterolactone	5.768	299.12	36235.7	Furanoid lignans	185254-87-9	HMDB0006101	-
M371T30_NEG	Arctigenin	0.5	371.149	123117	Furanoid lignans	7770-78-7	HMDB0030087	-
M343T373_NEG	.beta.-glycerophosphate	6.219	343.021	14864.4	Glycerophospholipids	17181-54-3	HMDB0002520	-
M953T145_POS	1-Myristoyl-sn-glycero-3-phosphocholine	2.423	952.639	27091.7	Glycerophospholipids	20559-16-4	HMDB0010379	-
M724T58_POS	1,2-dioleoyl-sn-glycero-3-phosphate	0.975	723.513	29461.6	Glycerophospholipids	14268-17-8	HMDB0007865	-
M759T150_POS	1-palmitoyl-2-linoleoyl-sn-glycero-3-phosphocholine	2.503	758.567	32766.8	Glycerophospholipids	17708-90-6	HMDB0007973	-
M476T146_POS	1-palmitoyl-2-hydroxy-sn-glycero-3-phosphoethanolamine	2.434	476.298	33974	Glycerophospholipids	53862-35-4	HMDB0011503	-
M823T147_NEG	1-stearoyl-2-oleoyl-sn-glycero-3-phosphocholine	2.458	822.558	38454.9	Glycerophospholipids	56421-10-4	HMDB0008038	-
M452T207_NEG	1-palmitoyl-2-hydroxy-sn-glycero-3-phosphoethanolamine	3.458	452.271	46044.7	Glycerophospholipids	53862-35-4	HMDB0011503	-
M785T152_POS	1-palmitoyl-2-stearoyl-sn-glycero-3-phosphocholine	2.53	784.579	46390.3	Glycerophospholipids	59403-51-9	HMDB0007970	-
M769T152_POS	1-stearoyl-2-oleoyl-sn-glycero-3-phosphoethanolamine	2.535	768.551	49051.5	Glycerophospholipids	6418-95-7	HMDB0008993	-
M801T147_POS	PC(16:0/16:0)	2.445	800.52	88698.9	Glycerophospholipids	63-89-8	HMDB0000564	C00157
M480T200_NEG	1-stearoyl-2-hydroxy-sn-glycero-3-phosphoethanolamine	3.338	480.304	91841.5	Glycerophospholipids	69747-55-3	HMDB0011130	-
M777T146_POS	1-(1z-octadecenyl)-2-(4z,7z,10z,13z,16z,19z-docosahexaenoyl)-sn-glycero-3-phosphoethanolamine	2.434	776.555	100886	Glycerophospholipids	206059-98-5	HMDB0011394	-
M571T248_NEG	1-hexadecanoyl-sn-glycero-3-phospho-(1'-myo-inositol)	4.132	571.281	103127	Glycerophospholipids	1425501-12-7	HMDB0061695	-
M512T206_NEG	1-myristoyl-sn-glycero-3-phosphocholine	3.425	512.275	114156	Glycerophospholipids	20559-16-4	HMDB0010379	-
M783T151_POS	2-oleoyl-1-palmitoyl-sn-glycero-3-phosphocholine	2.524	782.565	136423	Glycerophospholipids	26853-31-6	HMDB0007972	-
M478T207_POS	1-palmitoyl-sn-glycero-3-phosphocholine	3.454	478.326	216761	Glycerophospholipids	17364-16-8	HMDB0010382	-
M548T196_POS	1-o-octadecyl-sn-glyceryl-3-phosphorylcholine	3.263	548.369	231868	Glycerophospholipids	74430-89-0	HMDB0011149	C04317
M516T205_NEG	1-hexadecyl-sn-glycero-3-phosphocholine	3.414	516.314	246760	Glycerophospholipids	17364-16-8	HMDB0010382	C04230
M478T203_NEG	1-oleoyl-sn-glycero-3-phosphoethanolamine	3.381	478.289	248234	Glycerophospholipids	89576-29-4	HMDB0011506	-
M556T198_NEG	1-oleoyl-sn-glycero-3-phosphocholine	3.305	556.314	433826	Glycerophospholipids	19420-56-5	HMDB0002815	-
M482T204_POS	1-hexadecyl-sn-glycero-3-phosphocholine	3.408	482.359	1.75524e+06	Glycerophospholipids	17364-16-8	HMDB0010382	C04230
M522T197_POS	1-oleoyl-sn-glycero-3-phosphocholine	3.29	522.355	2.17604e+06	Glycerophospholipids	19420-56-5	HMDB0002815	-
M205T34_POS	Harmane	0.564	205.084	26542.7	Harmala alkaloids	486-84-0	HMDB0035196	C09209
M213T343_NEG	Harmaline	5.719	213.087	60065.5	Harmala alkaloids	304-21-2	HMDB0030310	C06536
M215T361_POS	Harmaline	6.024	215.138	60341.5	Harmala alkaloids	304-21-2	HMDB0030310	C06536
M201T265_POS	Harmalol	4.421	201.123	221899	Harmala alkaloids	525-57-5	HMDB0029838	-
M199T268_NEG	Harmalol	4.471	199.108	270275	Harmala alkaloids	525-57-5	HMDB0029838	-
M195T382_NEG	Galactonic acid	6.371	195.049	21614	Hydroxy acids and derivatives	13382-27-9	HMDB0000565	C00880
M189T471_NEG	3-dehydroquinic acid	7.845	189.039	22072.7	Hydroxy acids and derivatives	10534-44-8	HMDB0012710	C00944
M133T360_POS	6-hydroxyhexanoate	5.992	133.072	25169.5	Hydroxy acids and derivatives	1191-25-9	HMDB0012843	C06103
M288T298_NEG	Atropine	4.963	288.154	56037.2	Hydroxy acids and derivatives	51-34-3	HMDB0003573	C01479
M133T522_NEG	L-Malic acid	8.705	133.013	107231	Hydroxy acids and derivatives	97-67-6	HMDB0000156	C00149
M133T430_NEG	Malate	7.175	133.014	1.09481e+06	Hydroxy acids and derivatives	97-67-6	HMDB0000156	-
M131T173_2_NEG	6-hydroxyhexanoate	2.887	131.071	6.09298e+06	Hydroxy acids and derivatives	1191-25-9	HMDB0012843	C06103
M193T425_NEG	Caffeine	7.088	193.097	10563	Imidazopyrimidines	1958-08-02	HMDB0001847	C07481
M511T258_POS	Ganciclovir	4.301	511.188	14785.9	Imidazopyrimidines	82410-32-0	HMDB0015139	-
M363T440_NEG	1-methyluric acid	7.326	363.089	17868.1	Imidazopyrimidines	708-79-2	HMDB0003099	C16359
M216T50_POS	Kinetin	0.83	216.067	19630	Imidazopyrimidines	525-79-1	HMDB0012245	-
M214T302_NEG	Kinetin	5.03	214.063	20330.1	Imidazopyrimidines	525-79-1	HMDB0012245	-
M280T233_POS	Etamiphyllin	3.876	280.179	33005.6	Imidazopyrimidines	314-35-2	HMDB0041889	-
M164T119_POS	Dimethylaminopurine	1.976	164.091	33534.4	Imidazopyrimidines	938-55-6	HMDB0000473	-
M150T299_NEG	Guanine	4.985	150.039	43237.1	Imidazopyrimidines	73-40-5	HMDB0000132	C00242
M509T241_NEG	Ganciclovir	4.021	509.195	52789.3	Imidazopyrimidines	82410-32-0	HMDB0015139	-
M237T255_POS	Dyphylline	4.258	237.122	56336.7	Imidazopyrimidines	479-18-5	HMDB0014789	-
M167T296_NEG	Uric acid	4.93	167.011	68895.3	Imidazopyrimidines	69-93-2	HMDB0000289	C00366
M150T254_POS	3-methyladenine	4.236	150.076	99038.5	Imidazopyrimidines	5142-23-4	HMDB0011600	-
M153T183_POS	Xanthine	3.045	153.039	109393	Imidazopyrimidines	69-89-6	HMDB0000292	C00385
M119T181_POS	Adenine	3.024	119.034	144163	Imidazopyrimidines	73-24-5	HMDB0000034	C00147
M150T135_POS	N6-methyladenine	2.25	150.076	149665	Imidazopyrimidines	443-72-1	HMDB0002099	-
M121T116_POS	Purine	1.932	121.05	175295	Imidazopyrimidines	120-73-0	HMDB0001366	-
M224T390_NEG	Acyclovir	6.502	224.022	192337	Imidazopyrimidines	59277-89-3	HMDB0014925	C06810
M152T298_1_POS	Guanine	4.963	152.055	327946	Imidazopyrimidines	73-40-5	HMDB0000132	C00242
M151T231_NEG	Xanthine	3.856	151.026	551649	Imidazopyrimidines	69-89-6	HMDB0000292	C00385
M135T181_NEG	Hypoxanthine	3.02	135.031	854843	Imidazopyrimidines	68-94-0	HMDB0000157	C00262
M195T306_NEG	3,7-Dimethyluric acid	5.108	195.045	1.38595e+06	Imidazopyrimidines	13087-49-5	HMDB0001982	C16360
M137T182_POS	Hypoxanthine	3.029	137.045	1.1105e+07	Imidazopyrimidines	68-94-0	HMDB0000157	C00262
M296T59_NEG	Sulindac	0.976	296.057	77062.1	Indenes and isoindenes	38194-50-2	HMDB0014743	-
M204T395_POS	Indole-3-butyric acid	6.582	204.085	12007.6	Indoles and derivatives	133-32-4	HMDB0002096	-
M232T182_POS	6-hydroxymelatonin	3.035	232.077	14393.8	Indoles and derivatives	2208-41-5	HMDB0004081	C05643
M130T50_POS	Indole-3-carbinol	0.841	130.064	15044.7	Indoles and derivatives	700-06-1	HMDB0005785	-
M228T384_POS	Carprofen	6.4	228.052	18903.8	Indoles and derivatives	53716-49-7	HMDB0014959	-
M247T432_NEG	6-hydroxymelatonin	7.207	247.091	20027.3	Indoles and derivatives	2208-41-5	HMDB0004081	C05643
M226T390_2_POS	Indole-3-pyruvic acid	6.496	226.068	21539.1	Indoles and derivatives	392-12-1	HMDB0060484	C00331
M221T296_POS	5-hydroxy-l-tryptophan	4.941	221.093	23224.8	Indoles and derivatives	4350-09-08	HMDB0000472	C00643
M241T184_POS	N-acetyl-5-hydroxytryptamine	3.067	241.099	24954.2	Indoles and derivatives	1210-83-9	HMDB0001238	C00978
M204T227_NEG	5-methoxyindoleacetate	3.791	204.086	26052.6	Indoles and derivatives	3471-31-6	HMDB0004096	C05660
M219T268_NEG	5-hydroxy-l-tryptophan	4.459	219.079	27287.4	Indoles and derivatives	4350-09-08	HMDB0000472	C00643
M312T87_NEG	Indomethacin	1.45	312.072	31595.8	Indoles and derivatives	53-86-1	HMDB0014473	-
M201T63_POS	Camalexin	1.053	201.068	37544.2	Indoles and derivatives	135531-86-1	HMDB0038631	-
M231T388_POS	Pindolol	6.475	231.168	37949.8	Indoles and derivatives	13523-86-9	HMDB0015095	-
M233T411_POS	Melatonin	6.858	233.149	42514.6	Indoles and derivatives	73-31-4	HMDB0001389	C01598
M148T346_POS	Isatin	5.768	148.034	46831	Indoles and derivatives	91-56-5	HMDB0061933	-
M118T269_POS	Indole-3-carboxylic acid	4.485	118.064	47489.1	Indoles and derivatives	771-50-6	HMDB0003320	-
M144T268_POS	3-(2-hydroxyethyl)indole	4.475	144.079	51278.8	Indoles and derivatives	526-55-6	HMDB0003447	C00955
M186T413_NEG	Indolelactic acid	6.879	186.039	54570.9	Indoles and derivatives	7417-65-4	HMDB0000671	-
M182T383_POS	Zolmitriptan	6.389	182.08	68656.7	Indoles and derivatives	139264-17-8	HMDB0014460	-
M231T410_NEG	Melatonin	6.836	231.097	79981.3	Indoles and derivatives	73-31-4	HMDB0001389	C01598
M177T68_POS	Serotonin	1.141	177.11	85058.1	Indoles and derivatives	50-67-9	HMDB0000259	C00780
M217T542_NEG	N-acetyl-5-hydroxytryptamine	9.031	217.118	85848	Indoles and derivatives	1210-83-9	HMDB0001238	C00978
M288T424_1_POS	Rutaecarpine	7.065	288.099	106044	Indoles and derivatives	84-26-4	HMDB0042010	-
M146T270_POS	Indole-3-carboxaldehyde	4.496	146.059	117938	Indoles and derivatives	487-89-8	HMDB0029737	-
M203T293_NEG	L-Tryptophan	4.885	203.081	124432	Indoles and derivatives	73-22-3	HMDB0000929	C00078
M265T70_NEG	Pindolol	1.174	265.179	238562	Indoles and derivatives	13523-86-9	HMDB0015095	-
M261T271_POS	Ropinirole	4.517	261.217	292036	Indoles and derivatives	91374-21-9	HMDB0014413	-
M188T341_NEG	1h-indole-3-propanoic acid	5.676	188.092	386466	Indoles and derivatives	830-96-6	HMDB0002302	-
M158T231_2_NEG	Indole-3-butyric acid	3.846	158.082	390531	Indoles and derivatives	133-32-4	HMDB0002096	-
M202T62_NEG	Indole-3-pyruvic acid	1.031	202.017	589777	Indoles and derivatives	392-12-1	HMDB0060484	C00331
M335T252_POS	Mitomycin c	4.192	335.13	666552	Indoles and derivatives	1950-07-07	HMDB0014450	-
M203T270_NEG	DL-tryptophan	4.504	203.082	1.69061e+06	Indoles and derivatives	1954-12-06	HMDB0030396	-
M188T269_POS	DL-tryptophan	4.485	188.07	1.78443e+06	Indoles and derivatives	1954-12-06	HMDB0030396	-
M160T380_NEG	Indole-3-carboxylic acid	6.328	160.062	3.25671e+06	Indoles and derivatives	771-50-6	HMDB0003320	-
M423T188_NEG	Licoricidin	3.13	423.283	10155.3	Isoflavonoids	30508-27-1	HMDB0034183	-
M286T307_POS	Pratensein	5.124	286.039	12345.1	Isoflavonoids	2284-31-3	HMDB0030617	-
M353T262_NEG	Licoisoflavone a	4.371	353.114	12586.8	Isoflavonoids	66056-19-7	HMDB0034125	-
M429T34_NEG	Ononin	0.565	429.102	13320.9	Isoflavonoids	486-62-4	HMDB0033987	-
M335T315_NEG	Psoralidin	5.249	335.098	15522.9	Isoflavonoids	18642-23-4	HMDB0034050	-
M284T390_NEG	Pratensein	6.502	284.042	16968	Isoflavonoids	2284-31-3	HMDB0030617	-
M289T429_NEG	Daidzein	7.142	289.034	17665.1	Isoflavonoids	486-66-8	HMDB0003312	C10208
M431T365_POS	Ononin	6.077	431.138	19782.8	Isoflavonoids	486-62-4	HMDB0033987	-
M485T379_POS	Trifolirhizin	6.324	485.108	19801.8	Isoflavonoids	6807-83-6	HMDB0036630	-
M283T322_NEG	Biochanin a	5.373	283.068	24719.4	Isoflavonoids	491-80-5	HMDB0002338	C00814
M395T388_POS	Rotenone	6.475	395.163	30174.2	Isoflavonoids	83-79-4	HMDB0034436	C07593
M415T442_NEG	Daidzin	7.359	415.097	34124.7	Isoflavonoids	552-66-9	HMDB0033991	-
M269T425_NEG	6,7,4'-trihydroxyisoflavone	7.088	269.112	44297.9	Isoflavonoids	17817-31-1	HMDB0031715	C14314
M337T252_POS	Psoralidin	4.192	337.126	48443.4	Isoflavonoids	18642-23-4	HMDB0034050	-
M269T237_NEG	Genistein	3.955	269.076	99147	Isoflavonoids	446-72-0	HMDB0003217	C06563
M299T134_NEG	Tectorigenin	2.228	299.067	103080	Isoflavonoids	548-77-6	HMDB0042024	-
M255T413_POS	Daidzein	6.89	255.063	119615	Isoflavonoids	486-66-8	HMDB0003312	C10208
M535T238_NEG	Formononetin	3.966	535.15	275999	Isoflavonoids	485-72-3	HMDB0005808	C00858
M478T360_2_POS	Cefotaxime	6.003	478.07	11355.2	Lactams	63527-52-6	HMDB0014636	-
M227T80_POS	.epsilon.-caprolactam	1.341	227.177	19812.1	Lactams	105-60-2	HMDB0062769	C06593
M395T355_NEG	Cephalothin	5.921	395.037	22483	Lactams	153-61-7	HMDB0014599	-
M408T521_NEG	Ezetimibe	8.681	408.158	23380.4	Lactams	163222-33-1	HMDB0015108	-
M348T212_NEG	Ampicillin	3.535	348.121	25745.5	Lactams	69-53-4	HMDB0014559	-
M350T300_NEG	Lomefloxacin	5.008	350.136	32952	Lactams	98079-51-7	HMDB0015113	-
M302T214_NEG	Cephalexin	3.569	302.101	41767.8	Lactams	15686-71-2	HMDB0014707	-
M277T104_POS	Lactucin	1.732	277.117	132984	Lactones	1891-29-8	HMDB0035814	-
M87T389_POS	4-hydroxybutanoic acid lactone	6.486	87.0431	189190	Lactones	96-48-0	HMDB0000549	-
M129T417_NEG	L-gulono-1,4-lactone	6.945	129.019	796220	Lactones	1128-23-0	HMDB0003466	C01040
M295T355_POS	Isoliquiritigenin	5.918	295.024	11692.9	Linear 1,3-diarylpropanoids	961-29-5	HMDB0037316	C08650
M209T374_POS	Chalcone	6.239	209.088	17720.3	Linear 1,3-diarylpropanoids	94-41-7	HMDB0003066	-
M353T219_2_NEG	Xanthohumol	3.658	353.115	20283.7	Linear 1,3-diarylpropanoids	6754-58-1	HMDB0037479	-
M364T251_POS	Propafenone	4.181	364.185	25204.5	Linear 1,3-diarylpropanoids	54063-53-5	HMDB0015313	-
M391T223_NEG	Sofalcone	3.724	391.209	43874.1	Linear 1,3-diarylpropanoids	64506-49-6	HMDB0042013	-
M273T148_NEG	Phloretin	2.469	273.053	878317	Linear 1,3-diarylpropanoids	60-82-2	HMDB0003306	C00774
M635T270_NEG	Zearalenone	4.504	635.279	153977	Macrolides and analogues	17924-92-4	HMDB0031752	-
M319T172_NEG	.beta.-zearalenol	2.865	319.163	199699	Macrolides and analogues	71030-11-0	HMDB0041838	-
M319T504_POS	Zearalenone	8.405	319.148	932529	Macrolides and analogues	17924-92-4	HMDB0031752	-
M462T125_POS	Morphine-3-glucuronide	2.086	462.19	17239	Morphinans	20290-09-9	HMDB0041936	C16643
M254T434_POS	Normorphine	7.241	254.101	36289.4	Morphinans	466-97-7	HMDB0041959	C11785
M258T271_POS	Levorphanol	4.517	258.179	40876.6	Morphinans	1977-07-06	HMDB0014992	-
M229T262_POS	Ethylmorphine	4.367	229.116	50221.7	Morphinans	76-58-4	HMDB0015509	-
M326T311_NEG	6-acetylmorphine	5.185	326.121	57827.2	Morphinans	2784-73-8	HMDB0041812	-
M268T431_POS	6-acetylmorphine	7.186	268.127	125452	Morphinans	2784-73-8	HMDB0041812	-
M595T400_NEG	Eriocitrin	6.674	595.195	10164.2	Naphthalenes	13463-28-0	HMDB0005811	-
M231T416_POS	Naproxen	6.934	231.095	21138.8	Naphthalenes	22204-53-1	HMDB0001923	-
M260T132_POS	Propranolol	2.207	260.146	21732	Naphthalenes	525-66-6	HMDB0001849	-
M597T419_POS	Eriocitrin	6.988	597.176	54885.3	Naphthalenes	13463-28-0	HMDB0005811	-
M263T89_POS	Cafestol	1.486	263.162	21900.3	Naphthofurans	469-83-0	HMDB0035710	-
M362T123_POS	Diosbulbin b	2.053	362.174	108249	Naphthofurans	20086-06-0	HMDB0036777	-
M393T96_NEG	Columbin	1.593	393.134	38014.2	Naphthopyrans	471-54-5	HMDB0036837	-
M436T50_POS	Paxilline	0.841	436.251	918253	Naphthopyrans	57186-25-1	HMDB0030323	C13782
M434T50_NEG	Paxilline	0.837	434.236	1.08355e+07	Naphthopyrans	57186-25-1	HMDB0030323	C13782
M246T420_NEG	Emtricitabine	7	246.042	30933.3	Nucleoside and nucleotide analogues	143491-57-0	HMDB0015017	-
M245T260_1_POS	Pseudouridine	4.334	245.075	32151.1	Nucleoside and nucleotide analogues	1445-07-4	HMDB0000767	C02067
M243T261_NEG	Pseudouridine	4.349	243.061	474427	Nucleoside and nucleotide analogues（核苷和核苷酸类似物）	1445-07-4	HMDB0000767	C02067
M236T236_POS	Pamidronic acid	3.932	236.022	15862.3	Organic phosphonic acids and derivatives	40391-99-9	HMDB0014427	-
M124T94_NEG	2-aminoethylphosphonic acid	1.571	124.039	94791.6	Organic phosphonic acids and derivatives	2041-14-7	HMDB0011747	C03557
M237T265_NEG	D-erythro-imidazolylglycerol phosphate	4.415	237.034	20676.4	Organic phosphoric acids and derivatives	36244-87-8	HMDB0012208	C04666
M501T315_POS	Heptenophos	5.253	501.064	225736	Organic phosphoric acids and derivatives	23560-59-0	HMDB0031793	-
M251T316_POS	Taurine	5.275	251.035	286302	Organic sulfonic acids and derivatives	107-35-7	HMDB0000251	C00245
M249T313_NEG	Taurine	5.222	249.019	703074	Organic sulfonic acids and derivatives	107-35-7	HMDB0000251	C00245
M166T225_NEG	Guanidinoethyl sulfonate	3.758	166.018	896969	Organic sulfonic acids and derivatives	543-18-0	HMDB0003584	C01959
M180T169_NEG	Acamprosate	2.821	180.032	1.16157e+06	Organic sulfonic acids and derivatives	77337-76-9	HMDB0014797	-
M160T393_NEG	Carnitine	6.557	160.096	13949.5	Organonitrogen compounds	541-15-1	HMDB0000062	C00487
M182T513_NEG	Phosphorylcholine	8.549	182.057	14297.2	Organonitrogen compounds	3616-04-04	HMDB0001565	C00588
M206T339_POS	Phenformin	5.642	206.12	16406.1	Organonitrogen compounds	114-86-3	HMDB0015050	-
M267T339_POS	Nevirapine	5.652	267.136	18062.6	Organonitrogen compounds	129618-40-2	HMDB0014383	-
M328T38_2_POS	Stearoyl ethanolamide	0.63	328.32	18262.5	Organonitrogen compounds	111-57-9	HMDB0013078	-
M300T139_POS	Sphingosine	2.315	300.288	26773.3	Organonitrogen compounds	123-78-4	HMDB0000252	C00319
M211T194_POS	Altretamine	3.231	211.18	33883.5	Organonitrogen compounds	645-05-6	HMDB0014631	-
M205T146_POS	Ethambutol	2.434	205.169	37737.9	Organonitrogen compounds	74-55-5	HMDB0014474	-
M76T340_POS	Trimethylamine n-oxide	5.673	76.0753	52849.3	Organonitrogen compounds	1184-78-7	HMDB0000925	C01104
M118T212_POS	Gyromitrin	3.531	118.121	56858	Organonitrogen compounds	16568-02-8	HMDB0033952	-
M210T381_POS	Porphobilinogen	6.356	210.073	62981.2	Organonitrogen compounds	487-90-1	HMDB0000245	C00931
M318T72_POS	Phytosphingosine	1.207	318.299	76351	Organonitrogen compounds	554-62-1	HMDB0004610	C12144
M348T38_POS	Arachidonoyl ethanolamide	0.63	348.288	99547.4	Organonitrogen compounds	94421-68-8	HMDB0004080	C11695
M326T38_2_POS	N-oleoylethanolamine	0.642	326.302	109023	Organonitrogen compounds	111-58-0	HMDB0002088	C20792
M199T74_POS	5-acetylamino-6-amino-3-methyluracil	1.229	199.106	145831	Organonitrogen compounds	19893-78-8	HMDB0004400	C16366
M254T126_NEG	Imidacloprid	2.107	254.031	174517	Organonitrogen compounds	105827-78-9	HMDB0040292	-
M302T37_POS	Trihexyphenidyl	0.619	302.246	182263	Organonitrogen compounds	144-11-6	HMDB0014520	-
M242T516_NEG	Porphobilinogen	8.594	242.113	331309	Organonitrogen compounds	487-90-1	HMDB0000245	C00931
M280T37_POS	Palmitoleoyl ethanolamide	0.619	280.261	365021	Organonitrogen compounds	94421-67-7	HMDB0013648	-
M372T37_POS	Docosahexaenoyl ethanolamide	0.619	372.288	402445	Organonitrogen compounds	162758-94-3	HMDB0013658	-
M86T273_POS	1,5-pentanediamine	4.549	86.0963	426162	Organonitrogen compounds	462-94-2	HMDB0002322	C01672
M184T563_POS	Phosphorylcholine	9.375	184.072	496286	Organonitrogen compounds	3616-04-04	HMDB0001565	C00588
M184T161_1_POS	Phosphocholine	2.683	184.063	619024	Organonitrogen compounds	3616-04-04	HMDB0001565	C00588
M146T389_2_POS	Acetylcholine	6.486	146.118	2.36934e+06	Organonitrogen compounds	51-84-3	HMDB0000895	C01996
M162T370_2_POS	L-carnitine	6.163	162.113	2.92686e+06	Organonitrogen compounds	541-15-1	HMDB0000062	C00318
M120T268_POS	2-amino-1-phenylethanol	4.475	120.081	4.2274e+06	Organonitrogen compounds	7568-93-6	HMDB0001065	-
M132T369_POS	Triethanolamine	6.152	132.103	5.15389e+06	Organonitrogen compounds	102-71-6	HMDB0032538	C06771
M327T296_NEG	L-fucose	4.941	327.106	10266.9	Organooxygen compounds	6696-41-9	HMDB0000174	C01019
M285T302_1_NEG	Salicin	5.03	285.107	10461.3	Organooxygen compounds	138-52-3	HMDB0003546	C01451
M297T238_POS	Disulfiram	3.963	297.083	12747.6	Organooxygen compounds	113146-74-0	HMDB0034341	-
M387T384_NEG	Lactulose	6.404	387.098	13250.3	Organooxygen compounds	4618-18-2	HMDB0000740	-
M684T13_POS	Acarbose	0.218	684.201	13756.3	Organooxygen compounds	56180-94-0	HMDB0014429	C06802
M93T269_POS	Glycerol	4.485	93.069	13814.1	Organooxygen compounds	56-81-5	HMDB0000131	C00116
M347T388_1_NEG	Shikimate	6.458	347.087	14194.9	Organooxygen compounds	138-59-0	HMDB0003070	C00493
M323T378_NEG	Lactose	6.295	323.081	15098.1	Organooxygen compounds	5965-66-2	HMDB0041627	C00243
M377T364_NEG	Sucrose	6.071	377.104	15406.5	Organooxygen compounds	57-50-1	HMDB0000258	C00089
M228T335_POS	Mucic acid	5.59	228.062	15807	Organooxygen compounds	526-99-8	HMDB0000639	C00879
M383T447_NEG	Maltotetraose	7.446	383.115	15923.9	Organooxygen compounds	34612-38-9	HMDB0001296	-
M308T308_NEG	N-acetylneuraminate	5.141	308.076	16227.4	Organooxygen compounds	19342-33-7	HMDB0000230	C00270
M323T384_POS	Chitobiose	6.4	323.142	16777.5	Organooxygen compounds	35061-50-8	HMDB0062702	C01674
M178T392_POS	4-methylmethcathinone	6.529	178.132	17850.7	Organooxygen compounds	1189805-46-6	HMDB0041923	-
M466T187_NEG	Tobramycin	3.119	466.258	19317.8	Organooxygen compounds	32986-56-4	HMDB0014822	C00397
M574T199_NEG	Gentamicin sulfate	3.316	574.266	19595.3	Organooxygen compounds	1403-66-3	HMDB0014936	-
M520T248_POS	Validamycin a	4.127	520.203	19748.2	Organooxygen compounds	37248-47-8	HMDB0036592	C12112
M632T388_NEG	3'-sialyllactose	6.469	632.199	20620	Organooxygen compounds	35890-38-1	HMDB0000825	-
M173T238_2_NEG	Shikimic acid	3.966	173.044	21815.6	Organooxygen compounds	138-59-0	HMDB0003070	C00493
M517T447_NEG	D-glucosamine 1-phosphate	7.446	517.102	21994.4	Organooxygen compounds	6866-69-9	HMDB0001367	C06156
M502T389_NEG	Amygdalin	6.491	502.172	22038.5	Organooxygen compounds	29883-15-6	HMDB0035030	C08325
M341T436_NEG	Coniferin	7.273	341.144	22344.8	Organooxygen compounds	124151-33-3	HMDB0013682	C00761
M206T323_NEG	3-hydroxykynurenine	5.383	206.048	23180.8	Organooxygen compounds	484-78-6	HMDB0000732	-
M220T271_NEG	N-acetyl-d-mannosamine	4.515	220.081	24006.6	Organooxygen compounds	7772-94-3	HMDB0001129	C00645
M528T240_POS	Hygromycin b	4.007	528.262	24466.5	Organooxygen compounds	31282-04-9	HMDB0034229	-
M376T248_POS	Simmondsin	4.127	376.159	25556.2	Organooxygen compounds	51771-52-9	HMDB0030394	-
M187T536_POS	3-phospho-d-glycerate	8.941	187.142	26274.3	Organooxygen compounds	3443-58-1	HMDB0060180	C00197
M211T425_NEG	Perseitol	7.088	211.107	26611	Organooxygen compounds	527-06-0	HMDB0033750	-
M322T284_NEG	Cytidine 3'-monophosphate	4.736	322.065	27626	Organooxygen compounds	84-52-6	HMDB0240312	C05822
M501T410_NEG	Muramic acid	6.836	501.188	28001.4	Organooxygen compounds	1114-41-6	HMDB0003254	-
M347T360_POS	Acetohexamide	6.003	347.093	29109.2	Organooxygen compounds	968-81-0	HMDB0014558	-
M906T490_POS	Amphotericin b	8.175	906.461	30950.5	Organooxygen compounds	1397-89-3	HMDB0014819	C06573
M258T152_NEG	D-glucosamine 6-phosphate	2.536	258.042	32439.7	Organooxygen compounds	55722-81-1	HMDB0001254	C00352
M99T243_POS	2-hexenal	4.05	99.0905	32973.5	Organooxygen compounds	6728-26-3	HMDB0031496	-
M317T153_NEG	Arbutin	2.547	317.096	33007.3	Organooxygen compounds	497-76-7	HMDB0029943	C06186
M448T107_NEG	Glucolesquerellin	1.779	448.097	33290.8	Organooxygen compounds	74542-17-9	HMDB0038409	C17250
M522T459_POS	Melezitose	7.644	522.201	34167.2	Organooxygen compounds	597-12-6	HMDB0011730	-
M179T260_NEG	D-(+)-Galactose	4.338	179.081	39253.9	Organooxygen compounds	3646-73-9	HMDB0000143	C00984
M262T423_POS	Neolinustatin	7.054	262.127	40443.7	Organooxygen compounds	72229-42-6	HMDB0038482	-
M376T447_POS	Haloperidol	7.448	376.17	43671.3	Organooxygen compounds	52-86-8	HMDB0014645	-
M220T219_NEG	N-acetylmannosamine	3.658	220.063	44137.6	Organooxygen compounds	7772-94-3	HMDB0001129	C00645
M503T461_NEG	Raffinose	7.683	503.156	44657.4	Organooxygen compounds	512-69-6	HMDB0003213	C00492
M343T436_POS	Isomaltose	7.262	343.158	60630.6	Organooxygen compounds	37169-69-0	HMDB0002923	C00252
M186T67_POS	N-Acetylmannosamine	1.119	186.075	61900.9	Organooxygen compounds	7772-94-3	HMDB0001129	C00645
M341T185_NEG	alpha,alpha-Trehalose	3.086	341.104	61918.8	Organooxygen compounds	99-20-7	HMDB0000975	C01083
M421T449_NEG	.alpha.,.alpha.'-trehalose 6-phosphate	7.489	420.992	62694.9	Organooxygen compounds	4484-88-2	HMDB0001124	C00689
M193T395_NEG	D-pinitol	6.578	193.07	62757.7	Organooxygen compounds	10284-63-6	HMDB0034219	-
M365T410_POS	Galactinol	6.825	365.104	63375.1	Organooxygen compounds	3687-64-7	HMDB0005826	C01235
M322T120_NEG	3'-cmp	2.007	322.235	70688.5	Organooxygen compounds	84-52-6	HMDB0240312	C05822
M568T261_POS	Amikacin	4.356	568.264	78875.8	Organooxygen compounds	37517-28-5	HMDB0014622	-
M221T287_NEG	Isomaltose	4.788	221.092	80104.2	Organooxygen compounds	37169-69-0	HMDB0002923	C00252
M300T475_NEG	N-Acetyl-D-Glucosamine 6-Phosphate	7.91	300.047	81319.4	Organooxygen compounds	73495-11-1	HMDB0002817	C00357
M179T411_NEG	Myo-inositol	6.843	179.054	92666	Organooxygen compounds	87-89-8	HMDB0000211	C00137
M149T343_NEG	D-ribose	5.719	149.045	99300	Organooxygen compounds	613-83-2	HMDB0000283	-
M181T139_POS	L-(+)-gulose	2.315	181.095	104820	Organooxygen compounds	6027-89-0	HMDB0012326	C15923
M227T386_NEG	D-mannitol	6.432	227.101	107572	Organooxygen compounds	69-65-8	HMDB0000765	C00392
M483T241_NEG	Kanamycin a	4.021	483.242	113561	Organooxygen compounds	8063-07-08	HMDB0015303	C01822
M437T71_NEG	Pantothenic acid	1.185	437.205	121209	Organooxygen compounds	79-83-4	HMDB0000210	C00864
M179T371_NEG	Alpha-d-glucose	6.187	179.055	127410	Organooxygen compounds	492-62-6	HMDB0003345	C00267
M243T88_NEG	L-fucose-1-phosphate	1.462	243.016	135447	Organooxygen compounds	16562-59-7	HMDB0001265	C02985
M243T241_POS	Kanamycin a	4.018	243.133	137031	Organooxygen compounds	8063-07-08	HMDB0015303	C01822
M200T335_POS	2',6'-dihydroxy-4'-methoxyacetophenone	5.59	200.068	147867	Organooxygen compounds	7507-89-3	HMDB0029646	-
M165T131_POS	Cis-jasmone	2.185	165.137	148078	Organooxygen compounds	488-10-8	HMDB0035601	-
M360T410_POS	Trehalose	6.836	360.148	156467	Organooxygen compounds	99-20-7	HMDB0000975	C01083
M341T412_NEG	Trehalose	6.869	341.105	163936	Organooxygen compounds	99-20-7	HMDB0000975	C01083
M129T360_POS	Dulcitol	5.992	129.065	168282	Organooxygen compounds	488-45-9	HMDB0011632	C01697
M209T355_NEG	D-glucarate	5.921	209.053	168467	Organooxygen compounds	87-73-0	HMDB0000663	C00818
M220T296_NEG	N-acetylglucosamine	4.93	220.063	169639	Organooxygen compounds	14131-68-1	HMDB0000803	-
M260T516_NEG	Lotaustralin	8.594	260.123	189205	Organooxygen compounds	534-67-8	HMDB0033865	C08334
M190T391_NEG	L-kynurenine	6.525	190.07	294892	Organooxygen compounds	2922-83-0	HMDB0000684	C00328
M342T113_2_POS	Sucrose	1.876	342.299	455643	Organooxygen compounds	57-50-1	HMDB0000258	C00089
M551T351_NEG	6-phosphogluconic acid	5.847	551.028	459549	Organooxygen compounds	921-62-0	HMDB0001316	C00345
M353T152_NEG	Cryptochlorogenic acid	2.536	353.063	467504	Organooxygen compounds	905-99-7	HMDB0030653	-
M310T436_POS	N-acetylneuraminate	7.274	310.112	531488	Organooxygen compounds	19342-33-7	HMDB0000230	C00270
M126T76_POS	D-glucosamine 6-phosphate	1.274	126.054	542165	Organooxygen compounds	55722-81-1	HMDB0001254	C00352
M234T410_POS	Muramic acid	6.836	234.097	1.27299e+06	Organooxygen compounds	1114-41-6	HMDB0003254	-
M248T431_POS	Linamarin	7.175	248.112	2.35534e+06	Organooxygen compounds	554-35-8	HMDB0033699	C01594
M296T88_POS	Prunasin	1.475	296.135	2.70528e+06	Organooxygen compounds（化合物）	138-53-4	HMDB0035022	C00844
M241T268_POS	Anserine	4.464	241.153	20689.4	Peptidomimetics	584-85-0	HMDB0000194	C01262
M239T308_NEG	Anserine	5.141	239.102	23764.1	Peptidomimetics	584-85-0	HMDB0000194	C01262
M261T227_NEG	.alpha.-L-Glu-L-Asp	3.78	261.089	38194.8	Peptidomimetics	3918-84-1	HMDB0028815	-
M225T308_NEG	L-carnosine	5.141	225.087	175335	Peptidomimetics	305-84-0	HMDB0000033	C00386
M338T346_POS	Oxycodone	5.768	338.117	19477.2	Phenanthrenes and derivatives	76-42-6	HMDB0014640	-
M342T531_POS	Naltrexone	8.854	342.187	51713.8	Phenanthrenes and derivatives	16590-41-3	HMDB0014842	-
M358T531_2_POS	Nalbuphine	8.854	358.182	65813.5	Phenanthrenes and derivatives	20594-83-6	HMDB0014982	-
M302T360_POS	Oxymorphone	6.003	302.12	67249.4	Phenanthrenes and derivatives	76-41-5	HMDB0015323	-
M468T204_POS	Buprenorphine	3.401	468.307	138837	Phenanthrenes and derivatives	52485-79-7	HMDB0015057	-
M207T91_POS	Acetyleugenol	1.519	207.086	213334	Phenol esters	93-28-7	HMDB0034122	-
M250T307_POS	Alprenolol	5.124	250.163	16438.4	Phenol ethers	13655-52-2	HMDB0015004	-
M260T187_POS	Venlafaxine	3.123	260.183	21483.7	Phenol ethers	93413-69-5	HMDB0005016	-
M163T176_POS	Mexiletine	2.935	163.124	41232.1	Phenol ethers	31828-71-4	HMDB0014523	-
M292T70_POS	Penbutolol	1.162	292.225	49674.2	Phenol ethers	36507-48-9	HMDB0015447	-
M355T85_NEG	Pioglitazone	1.417	355.13	56088.2	Phenol ethers	111025-46-8	HMDB0015264	-
M123T76_POS	Trimethoprim	1.263	123.09	79167	Phenol ethers	738-70-5	HMDB0014583	-
M181T283_NEG	Homovanillic acid	4.715	181.06	12236.9	Phenols	306-08-1	HMDB0000118	C05582
M154T319_NEG	4-nitrocatechol	5.311	154.017	13380.7	Phenols	3316-09-04	HMDB0002916	C02235
M211T309_POS	Sinapyl alcohol	5.156	211.106	15004.6	Phenols	537-33-7	HMDB0013070	C02325
M183T342_POS	Homovanillic acid	5.694	183.075	16477.3	Phenols	306-08-1	HMDB0000118	C05582
M164T165_NEG	Butylated hydroxyanisole	2.755	164.071	27843.2	Phenols	121-00-6	HMDB0059925	-
M300T245_NEG	Dobutamine	4.087	300.154	31693	Phenols	34368-04-2	HMDB0014979	-
M166T270_NEG	Synephrine	4.493	166.077	33203.4	Phenols	1994-07-05	HMDB0004826	-
M395T202_NEG	Dl-4-hydroxy-3-methoxymandelic acid	3.37	395.12	34041.2	Phenols	13244-77-4	HMDB0000291	C05584
M306T298_POS	Capsaicin	4.963	306.213	37198.6	Phenols	404-86-4	HMDB0002227	C06866
M367T467_NEG	3,4-dihydroxymandelic acid	7.791	367.06	37637.2	Phenols	775-01-9	HMDB0001866	C05580
M77T268_2_POS	Phenol	4.475	77.0376	41440.4	Phenols	87-66-1	HMDB0013674	-
M168T513_NEG	6-Hydroxydopamine	8.549	168.042	42452.5	Phenols	1199-18-4	HMDB0001537	-
M209T270_2_NEG	Sinapyl alcohol	4.504	209.058	71015.6	Phenols	537-33-7	HMDB0013070	C02325
M226T340_POS	Terbutaline	5.663	226.154	78850.2	Phenols	23031-25-6	HMDB0015009	-
M308T105_POS	Dihydrocapsaicin	1.743	308.221	87083.1	Phenols	19408-84-5	HMDB0038457	-
M166T171_POS	Epinephrine	2.848	166.071	117766	Phenols	51-43-4	HMDB0000068	C00788
M121T207_POS	4-hydroxyphenethyl alcohol	3.443	121.064	138288	Phenols	501-94-0	HMDB0004284	C06044
M440T61_NEG	Folate	1.02	440.207	163766	Phenols	59-30-3	HMDB0000121	C00504
M180T411_POS	Metanephrine	6.852	180.101	211753	Phenols	5001-33-2	HMDB0004063	C05588
M295T77_POS	[6]-gingerol	1.285	295.189	219986	Phenols	58253-27-3	HMDB0005783	C10462
M136T314_POS	Dl-octopamine	5.232	136.075	239069	Phenols	104-14-3	HMDB0004825	C04227
M125T62_POS	3-methylcatechol	1.03	125.07	254670	Phenols	488-17-5	HMDB0301753	C02923
M304T143_NEG	Capsaicin	2.382	304.189	379537	Phenols	404-86-4	HMDB0002227	C06866
M319T394_POS	Bilobol	6.571	319.258	850559	Phenols	22910-86-7	HMDB0030983	-
M181T224_NEG	Hydroxyphenyllactic acid	3.736	181.05	13296.8	Phenylpropanoic acids	306-23-0	HMDB0000755	-
M181T350_NEG	3,4-dihydroxyhydrocinnamic acid	5.836	181.008	45912.2	Phenylpropanoic acids	1078-61-1	HMDB0000423	C10447
M165T349_POS	Hydroxyphenyllactic acid	5.821	165.063	51859	Phenylpropanoic acids	306-23-0	HMDB0000755	-
M184T368_POS	Phenyllactic acid	6.141	184.093	79957.9	Phenylpropanoic acids	828-01-3	HMDB0000779	C01479
M165T161_NEG	Phenyllactic acid	2.689	165.055	731961	Phenylpropanoic acids	828-01-3	HMDB0000779	C01479
M412T360_NEG	Longatin	6.006	412.142	32064.7	Phthalide isoquinolines	128-62-1	HMDB0033439	C09592
M414T453_POS	Longatin	7.546	414.157	143771	Phthalide isoquinolines	128-62-1	HMDB0033439	C09592
M330T440_POS	Paroxetine	7.328	330.129	34100.4	Piperidines	61869-08-7	HMDB0014853	-
M190T201_POS	Glutethimide	3.358	190.143	161708	Piperidines	77-21-4	HMDB0015505	-
M484T483_POS	T2 toxin	8.05	484.24	10692.5	Prenol lipids	21259-20-1	HMDB0036600	-
M667T131_NEG	Ginsenoside rh2	2.184	667.466	12003.6	Prenol lipids	78214-33-2	HMDB0039544	-
M329T308_NEG	Carnosol	5.141	329.181	13025.9	Prenol lipids	5957-80-2	HMDB0002121	-
M410T179_NEG	Glycyrrhizic acid	2.975	410.208	13170.8	Prenol lipids	1405-86-3	HMDB0029843	-
M383T248_1_POS	Farnesyl pyrophosphate	4.127	383.155	13584.5	Prenol lipids	13058-04-3	HMDB0000961	C00448
M641T268_NEG	Steviolbioside	4.459	641.326	13809.6	Prenol lipids	41093-60-1	HMDB0036707	-
M551T64_NEG	Ganoderic acid a	1.075	551.279	15997.6	Prenol lipids	81907-62-2	HMDB0034931	-
M499T431_NEG	Gossypol	7.186	499.198	17206.4	Prenol lipids	90141-22-3	HMDB0040723	C07667
M397T412_POS	Geniposidic acid	6.868	397.123	17257.6	Prenol lipids	27741-01-1	HMDB0034942	C11673
M539T155_NEG	Oleuropein	2.58	539.171	18497.4	Prenol lipids	32619-42-4	HMDB0035872	-
M473T208_POS	Maslinic acid	3.465	473.345	18535.4	Prenol lipids	4373-41-5	HMDB0002392	-
M387T389_NEG	Quassin	6.491	387.184	19733.8	Prenol lipids	76-78-8	HMDB0036587	-
M381T293_NEG	Farnesyl pyrophosphate	4.885	381.129	20733.1	Prenol lipids	13058-04-3	HMDB0000961	C00448
M227T299_POS	Genipin	4.984	227.068	22820	Prenol lipids	6902-77-8	HMDB0035830	-
M571T56_POS	2,6-cyclolycopene-1,5-diol	0.93	571.431	23028.4	Prenol lipids	223744-29-4	HMDB0034902	-
M359T36_POS	Pristanic acid	0.597	359.308	23221.2	Prenol lipids	1189-37-3	HMDB0000795	-
M477T223_POS	Obacunone	3.716	477.201	26999.6	Prenol lipids	751-03-1	HMDB0035858	-
M597T38_POS	Ubiquinone 30	0.642	597.453	27992.8	Prenol lipids	123563-64-4	HMDB0036064	-
M443T142_2_NEG	Menaquinone 4	2.36	443.289	28419.1	Prenol lipids	56973-41-2	HMDB0030020	C00828
M439T210_POS	Betulinic acid	3.498	439.361	34133.1	Prenol lipids	472-15-1	HMDB0030094	-
M313T182_POS	Teprenone	3.035	313.272	34835.4	Prenol lipids	3796-70-1	HMDB0031846	-
M493T204_NEG	Ganoderic acid f	3.403	493.243	36309.2	Prenol lipids	98665-15-7	HMDB0035988	-
M197T242_POS	Alantolactone	4.028	197.127	36436.2	Prenol lipids	546-43-0	HMDB0035906	-
M313T172_POS	Phytanic acid	2.869	313.32	38824	Prenol lipids	14721-66-5	HMDB0000801	-
M683T35_3_NEG	Ginsenoside f1	0.576	683.447	39267	Prenol lipids	53963-43-2	HMDB0039555	-
M385T137_1_POS	Aucubin	2.283	385.071	44150.3	Prenol lipids	479-98-1	HMDB0036562	-
M197T37_NEG	Guaiazulene	0.609	197.116	44576.4	Prenol lipids	489-84-9	HMDB0036648	-
M393T31_NEG	Bixin	0.522	393.226	46062.6	Prenol lipids	39937-23-0	HMDB0035074	-
M318T88_POS	Dehydroabietic acid	1.463	318.241	55855.3	Prenol lipids	1740-19-8	HMDB0061925	-
M449T378_POS	Agnuside	6.303	449.141	58743.1	Prenol lipids	11027-63-7	HMDB0036561	-
M469T543_NEG	Limonin	9.057	469.198	60445	Prenol lipids	1180-71-8	HMDB0035921	-
M449T35_2_NEG	Vitamin k1	0.587	449.359	61743.1	Prenol lipids	84-80-0	HMDB0003555	C02059
M383T62_NEG	Artesunate	1.031	383.149	72663.8	Prenol lipids	88495-63-0	HMDB0240267	-
M765T42_2_NEG	Ginsenoside rg5	0.702	765.455	73897.4	Prenol lipids	74964-14-0	HMDB0031830	-
M565T38_2_POS	Canthaxanthin	0.63	565.4	74766.5	Prenol lipids	514-78-3	HMDB0003154	C08583
M559T40_POS	Hyperforin	0.664	559.373	78689.3	Prenol lipids	11079-53-1	HMDB0030463	-
M513T401_NEG	Nomilin	6.685	513.193	84392.8	Prenol lipids	1063-77-0	HMDB0035772	-
M1020T204_NEG	Madecassoside	3.403	1019.5	96563.7	Prenol lipids	34540-22-2	HMDB0040122	-
M261T64_POS	Deoxynivalenol	1.064	261.123	108410	Prenol lipids	51481-10-8	HMDB0036156	-
M245T96_NEG	Isopentenyl pyrophosphate	1.604	245.021	109289	Prenol lipids	358-71-4	HMDB0001347	C00129
M283T37_NEG	Retinene	0.609	283.204	112205	Prenol lipids	564-87-4	HMDB0002152	C00376
M233T473_POS	Costunolide	7.885	233.148	172427	Prenol lipids	553-21-9	HMDB0036688	C09382
M133T69_POS	Perillaldehyde	1.152	133.085	204478	Prenol lipids	2111-75-3	HMDB0003647	-
M603T256_POS	Morphine n-oxide	4.268	603.291	207440	Prenol lipids	639-46-3	HMDB0029382	-
M537T401_POS	Nomilin	6.676	537.191	212163	Prenol lipids	1063-77-0	HMDB0035772	-
M345T412_NEG	Gibberellic acid	6.869	345.127	212165	Prenol lipids	1977-06-05	HMDB0003559	C01699
M307T47_NEG	Sclareol	0.783	307.262	213101	Prenol lipids	515-03-7	HMDB0036827	C09183
M384T53_POS	Diacetoxyscirpenol	0.886	384.219	245319	Prenol lipids	2270-40-8	HMDB0035104	-
M345T351_NEG	Gibberellate	5.857	345.012	304734	Prenol lipids	1977-06-05	HMDB0003559	C01699
M283T75_NEG	9-cis-retinal	1.25	283.225	324752	Prenol lipids	514-85-2	HMDB0006218	C16681
M329T406_POS	Gibberellic acid	6.76	329.133	345506	Prenol lipids	1977-06-05	HMDB0003559	C01699
M231T270_NEG	Costunolide	4.504	231.134	366335	Prenol lipids	553-21-9	HMDB0036688	C09382
M283T41_POS	Steviol	0.685	283.204	424180	Prenol lipids	471-80-7	HMDB0036706	-
M285T366_POS	Carnosol	6.099	285.178	477846	Prenol lipids	5957-80-2	HMDB0002121	-
M301T84_POS	4-Oxoretinol	1.408	301.215	558045	Prenol lipids	62702-55-0	HMDB0012329	C16683
M299T43_POS	All-trans-4-hydroxyretinoic acid	0.718	299.199	628684	Prenol lipids	66592-72-1	HMDB0006254	C16677
M469T278_POS	Madecassic acid	4.631	469.322	4.01915e+06	Prenol lipids	18449-41-7	HMDB0036670	-
M641T34_POS	Fucoxanthin	0.564	641.425	5.15823e+06	Prenol lipids	3351-86-8	HMDB0002741	-
M238T383_NEG	Dihydrobiopterin	6.382	238.068	15832.3	Pteridines and derivatives	6779-87-9	HMDB0000038	C00268
M252T230_NEG	D-neopterin	3.834	252.086	21909.4	Pteridines and derivatives	2009-64-5	HMDB0000845	C05926
M489T466_1_POS	Cytidine 5'-diphosphocholine	7.763	489.111	24206.7	Pteridines and derivatives	987-78-0	HMDB0001413	C00307
M238T386_1_POS	Sepiapterin	6.432	238.069	40209.9	Pteridines and derivatives	17094-01-8	HMDB0000238	C00835
M254T410_POS	D-neopterin	6.836	254.068	62135.7	Pteridines and derivatives	2009-64-5	HMDB0000845	C05926
M236T52_NEG	Sepiapterin	0.868	236.058	111469	Pteridines and derivatives	17094-01-8	HMDB0000238	C00835
M236T201_NEG	Biopterin	3.348	236.092	275295	Pteridines and derivatives	13039-82-2	HMDB0000817	C06313
M325T245_NEG	Pterine	4.087	325.105	567741	Pteridines and derivatives	2236-60-4	HMDB0000802	-
M285T234_POS	Xanthosine	3.9	285.081	10959.2	Purine nucleosides	146-80-5	HMDB0000299	C01762
M235T225_NEG	Didanosine	3.747	235.071	19165.8	Purine nucleosides	69655-05-6	HMDB0015037	-
M266T309_NEG	Deoxyguanosine	5.152	266.08	22886.3	Purine nucleosides	961-07-9	HMDB0000085	C00330
M312T116_POS	N2,N2-Dimethylguanosine	1.932	312.128	25885.5	Purine nucleosides	2140-67-2	HMDB0004824	-
M282T112_POS	2'-o-methyladenosine	1.866	282.119	34100.2	Purine nucleosides	2140-79-6	HMDB0004326	-
M280T397_2_NEG	2'-o-methyladenosine	6.622	280.101	71560.2	Purine nucleosides	2140-79-6	HMDB0004326	-
M252T152_POS	Deoxyadenosine	2.541	252.108	101784	Purine nucleosides	958-09-8	HMDB0000101	C00559
M283T238_NEG	Xanthosine	3.971	283.062	139695	Purine nucleosides	146-80-5	HMDB0000299	C01762
M253T121_POS	Deoxyinosine	2.009	253.118	145106	Purine nucleosides	890-38-0	HMDB0000071	C05512
M253T193_POS	2'-deoxyinosine	3.21	253.091	160815	Purine nucleosides	890-38-0	HMDB0000071	C05512
M250T410_NEG	Deoxyadenosine	6.826	250.091	222715	Purine nucleosides	958-09-8	HMDB0000101	C00559
M268T181_POS	Adenosine	3.024	268.103	233004	Purine nucleosides	58-61-7	HMDB0000050	C00212
M166T77_POS	7-methylguanosine	1.285	166.096	289533	Purine nucleosides	2140-77-4	HMDB0005862	-
M269T239_POS	Inosine	3.985	269.087	487123	Purine nucleosides	58-63-9	HMDB0000195	C00294
M251T194_NEG	Deoxyinosine	3.228	251.077	1.76158e+06	Purine nucleosides	890-38-0	HMDB0000071	C05512
M152T245_POS	Deoxyguanosine	4.083	152.056	1.8554e+06	Purine nucleosides	961-07-9	HMDB0000085	C00330
M267T237_2_NEG	Inosine	3.955	267.073	9.95448e+06	Purine nucleosides	58-63-9	HMDB0000195	C00294
M328T290_NEG	Adenosine 3',5'-cyclic monophosphate	4.831	328.042	10114	Purine nucleotides	60-92-4	HMDB0000058	C00575
M330T211_NEG	2'-deoxyadenosine 5'-monophosphate	3.524	330.085	15367.5	Purine nucleotides	653-63-4	HMDB0000905	C00360
M362T475_NEG	Guanosine 5'-monophosphate	7.921	362.047	17965.5	Purine nucleotides	85-32-5	HMDB0001397	C00144
M332T349_POS	2'-deoxyadenosine 5'-monophosphate	5.81	332.084	20695.4	Purine nucleotides	653-63-4	HMDB0000905	C00360
M330T455_NEG	Damp	7.586	330.058	32215	Purine nucleotides	653-63-4	HMDB0000905	C00360
M531T350_POS	Inosine 5'-triphosphate	5.832	530.981	40240	Purine nucleotides	132-06-9	HMDB0000189	C00081
M331T473_NEG	2'-Deoxyinosine 5'-monophosphate	7.878	331.042	61576.8	Purine nucleotides	3393-18-8	HMDB0006555	C06196
M348T465_POS	Adenosine 5'-monophosphate	7.742	348.069	65038	Purine nucleotides	61-19-8	HMDB0000045	C00020
M346T465_NEG	Adenosine 5'-monophosphate	7.748	346.051	75692.9	Purine nucleotides	61-19-8	HMDB0000045	C00020
M347T482_NEG	Inosine 5'-monophosphate	8.028	347.036	96974.9	Purine nucleotides	131-99-7	HMDB0000175	C00130
M427T351_NEG	Inosine 5'-diphosphate	5.857	427.014	159688	Purine nucleotides	1986-04-04	HMDB0003335	C00104
M338T500_POS	Nicotinate d-ribonucleotide	8.333	338.073	31130.8	Pyridine nucleotides	321-02-8	HMDB0001132	C01185
M335T457_POS	Nicotinamide ribotide	7.612	335.071	109396	Pyridine nucleotides	75414-16-3	HMDB0000229	C00455
M333T456_NEG	Nicotinamide ribotide	7.608	333.056	600362	Pyridine nucleotides	75414-16-3	HMDB0000229	C00455
M417T313_NEG	Nimodipine	5.214	417.15	13280.2	Pyridines and derivatives	66085-59-4	HMDB0014537	-
M230T373_NEG	Pyridoxamine 5-phosphate	6.219	230.047	22371	Pyridines and derivatives	529-96-4	HMDB0001555	C00647
M369T268_POS	Nifedipine	4.464	369.11	22691.3	Pyridines and derivatives	21829-25-4	HMDB0015247	-
M182T227_NEG	4-pyridoxic acid	3.78	182.045	39416.5	Pyridines and derivatives	82-82-6	HMDB0000017	C00847
M478T61_NEG	Nicardipine	1.02	478.184	49669	Pyridines and derivatives	55985-32-5	HMDB0014760	-
M184T54_POS	4-pyridoxic acid	0.897	184.059	52823.1	Pyridines and derivatives	82-82-6	HMDB0000017	C00847
M140T233_2_POS	6-hydroxynicotinic acid	3.876	140.059	80714.2	Pyridines and derivatives	5006-66-6	HMDB0002658	C01020
M78T233_POS	2(1h)-pyridinone	3.879	78.0329	84145.7	Pyridines and derivatives	142-08-5	HMDB0013751	-
M274T373_POS	Brompheniramine	6.217	274.035	101075	Pyridines and derivatives	86-22-6	HMDB0001941	-
M411T255_POS	Nisoldipine	4.247	411.153	106300	Pyridines and derivatives	63675-72-9	HMDB0014545	-
M210T107_NEG	Milrinone	1.779	210.058	114663	Pyridines and derivatives	78415-72-2	HMDB0014380	-
M187T233_POS	Pyridoxine	3.876	187.122	118976	Pyridines and derivatives	58-56-0	HMDB0301760	C00314
M241T388_POS	Pheniramine	6.464	241.153	128216	Pyridines and derivatives	86-21-5	HMDB0015557	-
M246T61_2_NEG	Pyridoxal phosphate	1.02	246.042	164356	Pyridines and derivatives	54-47-7	HMDB0001491	C00018
M123T68_POS	Niacinamide	1.13	123.054	247086	Pyridines and derivatives	98-92-0	HMDB0001406	C00153
M248T80_NEG	Pyridoxine 5-phosphate	1.339	248.057	321461	Pyridines and derivatives	447-05-2	HMDB0001319	C00627
M168T524_POS	Pyridoxal	8.736	168.078	557998	Pyridines and derivatives	66-72-8	HMDB0001545	C00250
M180T381_POS	4-(methylnitrosamino)-1-(3-pyridyl)-1-butanol	6.356	180.103	7.77899e+06	Pyridines and derivatives	76014-81-8	HMDB0041809	C19574
M227T167_NEG	2'-Deoxyuridine	2.777	227.065	22921.8	Pyrimidine nucleosides	951-78-0	HMDB0000012	C00526
M455T220_POS	2'-deoxycytidine	3.672	455.186	80367	Pyrimidine nucleosides	951-77-9	HMDB0000014	C00881
M241T133_NEG	Thymidine	2.217	241.08	112675	Pyrimidine nucleosides	50-89-5	HMDB0000273	C00214
M257T177_NEG	Ribothymidine	2.953	257.076	124887	Pyrimidine nucleosides	1463-10-1	HMDB0000884	-
M487T260_POS	Cytidine	4.334	487.175	139934	Pyrimidine nucleosides	65-46-3	HMDB0000089	C00475
M262T57_NEG	Gemcitabine	0.943	262.074	314171	Pyrimidine nucleosides	95058-81-4	HMDB0014584	-
M242T400_NEG	Cytidine	6.674	242.079	2.10773e+06	Pyrimidine nucleosides	65-46-3	HMDB0000089	C00475
M243T172_NEG	Uridine	2.865	243.061	3.5319e+06	Pyrimidine nucleosides	58-96-8	HMDB0000296	C00299
M608T456_POS	Udp-n-acetylglucosamine	7.601	608.082	12449.8	Pyrimidine nucleotides	528-04-1	HMDB0000290	C00043
M321T337_NEG	Thymidine 5'-monophosphate	5.612	321.05	19037.4	Pyrimidine nucleotides	365-07-1	HMDB0001227	C00364
M324T468_POS	Cytidine 5'-monophosphate	7.795	324.057	22684.1	Pyrimidine nucleotides	63-37-6	HMDB0000095	C00055
M306T298_NEG	2'-deoxycytidine 5'-monophosphate	4.974	306.03	23831.2	Pyrimidine nucleotides	1032-65-1	HMDB0001202	C00239
M645T473_1_POS	Thymidine 5'-monophosphate	7.885	645.107	25399.3	Pyrimidine nucleotides	365-07-1	HMDB0001227	C00364
M307T454_NEG	2'-deoxyuridine 5'-monophosphate	7.564	307.031	39100.3	Pyrimidine nucleotides	964-26-1	HMDB0001409	C00365
M484T341_NEG	Uridine 5'-triphosphate	5.687	484.156	43468.2	Pyrimidine nucleotides	63-39-8	HMDB0000285	C00075
M402T52_NEG	Cytidine 5'-diphosphate	0.868	402.264	44938.8	Pyrimidine nucleotides	63-38-7	HMDB0001546	C00112
M449T349_POS	Uridine 5'-diphosphate	5.821	448.976	49467.1	Pyrimidine nucleotides	58-98-0	HMDB0000295	C00015
M403T348_NEG	Uridine 5'-diphosphate	5.804	402.996	52147.2	Pyrimidine nucleotides	58-98-0	HMDB0000295	C00015
M606T456_NEG	Udp-n-acetylglucosamine	7.597	606.071	98942.5	Pyrimidine nucleotides	528-04-1	HMDB0000290	C00043
M323T445_NEG	Uridine 5'-monophosphate	7.413	323.026	195277	Pyrimidine nucleotides	58-97-9	HMDB0000288	C00105
M347T137_POS	Uridine 5'-monophosphate	2.283	347.035	228767	Pyrimidine nucleotides	58-97-9	HMDB0000288	C00105
M314T259_POS	Enrofloxacin	4.312	314.171	16442.4	Quinolines and derivatives	93106-60-6	HMDB0029861	-
M172T245_NEG	Quinaldic acid	4.076	172.06	19601.6	Quinolines and derivatives	1993-10-07	HMDB0000842	-
M314T225_NEG	Enrofloxacin	3.747	314.17	31921.5	Quinolines and derivatives	93106-60-6	HMDB0029861	-
M191T389_NEG	Quinate	6.48	191.055	42185.3	Quinolines and derivatives	91-63-4	HMDB0042004	C00296
M293T368_POS	Carteolol	6.131	293.206	62479.5	Quinolines and derivatives	51781-06-7	HMDB0014662	-
M374T223_NEG	Gatifloxacin	3.713	374.169	80901.9	Quinolines and derivatives	112811-59-3	HMDB0015178	-
M260T307_POS	Primaquine	5.113	260.159	84645.2	Quinolines and derivatives	90-34-6	HMDB0015219	-
M206T378_POS	Xanthurenic acid	6.303	206.039	89398.4	Quinolines and derivatives	59-00-7	HMDB0000881	C02470
M315T368_POS	Pergolide	6.131	315.187	139865	Quinolines and derivatives	66104-22-1	HMDB0015317	-
M275T228_NEG	Ofloxacin	3.802	275.102	226039	Quinolines and derivatives	82419-36-1	HMDB0015296	-
M204T85_NEG	Xanthurenic acid	1.417	204.032	258001	Quinolines and derivatives	59-00-7	HMDB0000881	C02470
M398T62_NEG	Quinacrine	1.031	398.196	422044	Quinolines and derivatives	83-89-6	HMDB0015235	-
M351T392_POS	Tetrahydrocorticosterone	6.54	351.246	10325.6	Steroids and steroid derivatives	600-63-5	HMDB0000449	C05476
M299T33_NEG	Adrenosterone	0.543	299.147	10761.8	Steroids and steroid derivatives	382-45-6	HMDB0006772	C05285
M633T39_POS	Calusterone	0.653	633.492	11159.4	Steroids and steroid derivatives	17021-26-0	HMDB0004627	-
M425T212_1_POS	25-hydroxycholesterol	3.531	425.347	11623.6	Steroids and steroid derivatives	2140-46-7	HMDB0006247	C15519
M285T302_2_NEG	16.alpha.-hydroxyestrone	5.03	285.143	11771.8	Steroids and steroid derivatives	966-06-3	HMDB0000313	C05300
M416T207_POS	Tomatidin	3.443	416.335	11944.4	Steroids and steroid derivatives	77-59-8	HMDB0034731	C10826
M349T386_NEG	Estrone sulfate	6.425	349.099	14398.6	Steroids and steroid derivatives	481-97-0	HMDB0001425	C02538
M445T443_NEG	Estrone glucuronide	7.392	445.189	14476.3	Steroids and steroid derivatives	2479-90-5	HMDB0004483	C11133
M295T270_2_POS	17alpha-hydroxyprogesterone	4.506	295.221	15906.1	Steroids and steroid derivatives	68-96-2	HMDB0000374	C01176
M405T211_POS	Cholesta-4,6-dien-3-one	3.52	405.307	16136.2	Steroids and steroid derivatives	566-93-8	HMDB0002394	-
M359T307_POS	Prednisone	5.124	359.192	16588.5	Steroids and steroid derivatives	1953-03-02	HMDB0014773	-
M421T42_NEG	Fludrocortisone	0.696	421.227	17065.5	Steroids and steroid derivatives	127-31-1	HMDB0014825	-
M357T362_2_NEG	Prednisone	6.038	357.174	18946.3	Steroids and steroid derivatives	1953-03-02	HMDB0014773	-
M269T214_POS	21-deoxycortisol	3.574	269.185	19206.5	Steroids and steroid derivatives	641-77-0	HMDB0004030	C05497
M401T166_POS	7.alpha.,27-dihydroxycholesterol	2.771	401.349	19559.8	Steroids and steroid derivatives	4725-24-0	HMDB0006281	C06341
M431T214_NEG	3.beta.,7.alpha.-dihydroxy-5-cholestenoic acid	3.569	431.298	19902.4	Steroids and steroid derivatives	115538-84-6	HMDB0012454	C17335
M525T509_POS	Amcinonide	8.479	525.224	20417.7	Steroids and steroid derivatives	51022-69-6	HMDB0014433	-
M291T389_POS	5alpha-androstan-17beta-ol-3-one	6.486	291.226	21230.7	Steroids and steroid derivatives	521-18-6	HMDB0002961	C03917
M479T503_POS	Triamcinolone diacetate	8.39	479.22	22049.2	Steroids and steroid derivatives	124-94-7	HMDB0014758	-
M269T297_POS	2-hydroxyestrone	4.952	269.148	22387.3	Steroids and steroid derivatives	362-06-1	HMDB0000343	C05298
M361T62_POS	Aldosterone	1.041	361.193	26373.5	Steroids and steroid derivatives	52-39-1	HMDB0000037	C01780
M253T70_POS	4-pregnen-17.alpha., 20.alpha.-diol-3-one	1.162	253.215	27367.7	Steroids and steroid derivatives	652-69-7	HMDB0011653	C04518
M465T29_NEG	Cholesteryl sulfate	0.479	465.297	27809.3	Steroids and steroid derivatives	1256-86-6	HMDB0000653	C18043
M389T37_2_NEG	Cholic acid	0.62	389.286	29338	Steroids and steroid derivatives	81-25-4	HMDB0000619	C00695
M271T152_POS	Estrone	2.541	271.181	29963.6	Steroids and steroid derivatives	481-97-0	HMDB0001425	C00468
M290T540_POS	Beta-estradiol	8.994	290.205	31403.9	Steroids and steroid derivatives	50-28-2	HMDB0000151	C00951
M472T211_POS	Glycochenodeoxycholate	3.509	472.279	33113.4	Steroids and steroid derivatives	640-79-9	HMDB0000637	C05466
M480T229_NEG	Taurodeoxycholic acid	3.813	480.268	38992	Steroids and steroid derivatives	516-50-7	HMDB0000896	-
M307T156_POS	Oxandrolone	2.595	307.236	40385.8	Steroids and steroid derivatives	53-39-4	HMDB0014759	-
M437T273_NEG	Chenodeoxycholate	4.548	437.272	41253.6	Steroids and steroid derivatives	474-25-9	HMDB0000518	C02528
M361T347_NEG	Hydrocortisone	5.783	360.985	42835.7	Steroids and steroid derivatives	50-23-7	HMDB0000063	C00735
M313T57_NEG	Progesterone	0.954	313.214	43879.5	Steroids and steroid derivatives	57-83-0	HMDB0001830	C00410
M383T211_POS	7.alpha.-hydroxy-4-cholesten-3-one	3.52	383.326	45285.7	Steroids and steroid derivatives	3862-25-7	HMDB0001993	C05455
M381T211_NEG	Cholesta-4,6-dien-3-one	3.524	381.308	51423.3	Steroids and steroid derivatives	566-93-8	HMDB0002394	-
M315T141_POS	21-Hydroxypregnenolone	2.348	315.227	63353.3	Steroids and steroid derivatives	1164-98-3	HMDB0004026	C05485
M380T37_2_POS	Solanidine	0.619	380.351	63961.7	Steroids and steroid derivatives	80-78-4	HMDB0003236	C06543
M539T63_POS	Cucurbitacin d	1.053	539.3	65791.3	Steroids and steroid derivatives	3877-86-9	HMDB0034695	C08796
M393T36_POS	Chenodeoxycholate	0.608	393.282	67372.3	Steroids and steroid derivatives	474-25-9	HMDB0000518	C02528
M436T38_POS	Solasodine	0.63	436.336	73300.5	Steroids and steroid derivatives	126-17-0	HMDB0035282	C10822
M367T167_POS	Zymosterol	2.782	367.341	75025.7	Steroids and steroid derivatives	128-33-6	HMDB0006271	C05437
M301T188_NEG	2-methoxyestradiol	3.13	301.174	87605.1	Steroids and steroid derivatives	362-07-2	HMDB0000405	C05302
M539T122_POS	Fusidic acid	2.031	539.314	91927.9	Steroids and steroid derivatives	6990-06-03	HMDB0015570	-
M294T108_POS	Trilostane	1.799	294.205	96136.2	Steroids and steroid derivatives	13647-35-3	HMDB0015240	-
M287T275_POS	4-androstene-3,17-dione	4.58	287.195	103719	Steroids and steroid derivatives	1963-05-08	HMDB0000053	C00280
M1052T203_POS	Tomatine	3.39	1051.58	105680	Steroids and steroid derivatives	17406-45-0	HMDB0034103	C10827
M331T108_POS	11.beta.,21-dihydroxy-5.beta.-pregnane-3,20-dione	1.799	331.226	139018	Steroids and steroid derivatives	566-01-8	HMDB0006757	C05475
M426T95_POS	Cholic acid	1.586	426.298	164235	Steroids and steroid derivatives	81-25-4	HMDB0000619	C00695
M425T38_1_POS	Cholesterol	0.63	425.305	165544	Steroids and steroid derivatives	57-88-5	HMDB0000067	C00187
M544T252_POS	Tauroursodeoxycholic acid	4.192	544.264	167594	Steroids and steroid derivatives	14605-22-2	HMDB0000874	-
M311T37_POS	Desogestrel	0.619	311.235	170825	Steroids and steroid derivatives	54024-22-5	HMDB0014449	-
M464T206_NEG	Glycocholic acid	3.425	464.31	185184	Steroids and steroid derivatives	68753-51-5	HMDB0000331	C01921
M309T29_2_NEG	Mestranol	0.489	309.171	238129	Steroids and steroid derivatives	72-33-3	HMDB0015446	-
M311T76_NEG	Pregna-4,16-diene-3,20-dione	1.273	311.184	244042	Steroids and steroid derivatives	1096-38-4	HMDB0000995	-
M414T106_POS	Glycodeoxycholic acid	1.766	414.299	282621	Steroids and steroid derivatives	360-65-6	HMDB0000631	-
M407T41_NEG	3alpha,7beta,12alpha-trihydroxy-5beta-cholan-24-oic acid	0.685	407.292	309066	Steroids and steroid derivatives	2955-27-3	HMDB0000917	C17644
M465T65_NEG	Androsterone glucuronide	1.086	465.238	326741	Steroids and steroid derivatives	3602-09-03	HMDB0004484	C11135
M466T206_POS	Glycocholic acid	3.433	466.327	349911	Steroids and steroid derivatives	68753-51-5	HMDB0000331	C01921
M325T36_POS	Megestrol acetate	0.597	325.215	354861	Steroids and steroid derivatives	3562-63-8	HMDB0014495	-
M416T84_POS	Lithocholylglycine	1.396	416.314	361741	Steroids and steroid derivatives	474-74-8	HMDB0000698	-
M354T109_2_POS	5.beta.-pregnane-3.alpha.,17.alpha.,20.alpha.-triol	1.81	354.299	391689	Steroids and steroid derivatives	27178-64-9	HMDB0006070	-
M199T120_POS	16.alpha.-hydroxyestrone	1.998	199.107	396357	Steroids and steroid derivatives	966-06-3	HMDB0000313	C05300
M285T180_NEG	Androstendione	2.998	285.18	577462	Steroids and steroid derivatives	1963-05-08	HMDB0000053	C00280
M271T196_NEG	Beta-estradiol	3.272	271.164	582382	Steroids and steroid derivatives	50-28-2	HMDB0000151	C00951
M315T47_NEG	Pregnenolone	0.783	315.23	844490	Steroids and steroid derivatives	145-13-1	HMDB0000253	C01953
M333T425_POS	Estrone sulfate	7.087	333.131	5.79369e+06	Steroids and steroid derivatives（类固醇和类固醇衍生物）	481-97-0	HMDB0001425	C02538
M271T429_POS	Polydatin	7.142	271.091	12849.6	Stilbenes	27208-80-6	HMDB0030564	-
M267T360_NEG	Diethylstilbestrol	5.996	267.117	23068.3	Stilbenes	56-53-1	HMDB0014400	-
M515T152_NEG	Rhapontigenin	2.536	515.157	43301.1	Stilbenes	500-65-2	HMDB0031842	-
M372T43_POS	Tamoxifen	0.718	372.252	77652.3	Stilbenes	10540-29-1	HMDB0014813	C07108
M389T300_NEG	Polydatin	5.008	389.116	104852	Stilbenes	27208-80-6	HMDB0030564	-
M319T94_NEG	Dihydromyricetin	1.571	319.057	468840	Stilbenes	149418-37-1	HMDB0040894	C02906
M461T435_POS	Oxytetracycline	7.252	461.149	13802.2	Tetracyclines	79-57-2	HMDB0014733	C06624
M586T263_POS	Tigecycline	4.389	586.274	17269.6	Tetracyclines	220620-09-7	HMDB0014700	-
M374T409_NEG	Oxytetracycline	6.814	374.118	110563	Tetracyclines	79-57-2	HMDB0014733	C06624
M584T262_NEG	Tigecycline	4.36	584.259	188776	Tetracyclines	220620-09-7	HMDB0014700	-
M216T70_POS	Atrazine	1.174	216.086	82153.6	Triazines	1912-24-9	HMDB0041830	C06551
M196T83_NEG	2-hydroxyatrazine	1.384	196.008	97059	Triazines	2163-68-0	HMDB0062766	C06552
M167T48_POS	Cyromazine	0.807	167.117	647102	Triazines	66215-27-8	HMDB0029862	C14147
M609T98_POS	Reserpine	1.631	609.269	65670.7	Yohimbine alkaloids	50-55-5	HMDB0014351	-
M353T30_2_NEG	Rauwolscine	0.5	353.195	144508	Yohimbine alkaloids	146-48-5	HMDB0015464	-
M633T272_NEG	Rescinnamine	4.537	633.263	176997	Yohimbine alkaloids（育亨宾类生物碱）	24815-24-5	HMDB0015311	-
