# Supplementary figures and images for: Regulation of intestinal flora by Suaeda salsa extract ameliorates hyperglycemia in a mouse model of type 2 diabetes mellitus
Source: Frontiers journal article supplement (doi:10.3389/fnut.2024.1499196), 2024-12-16

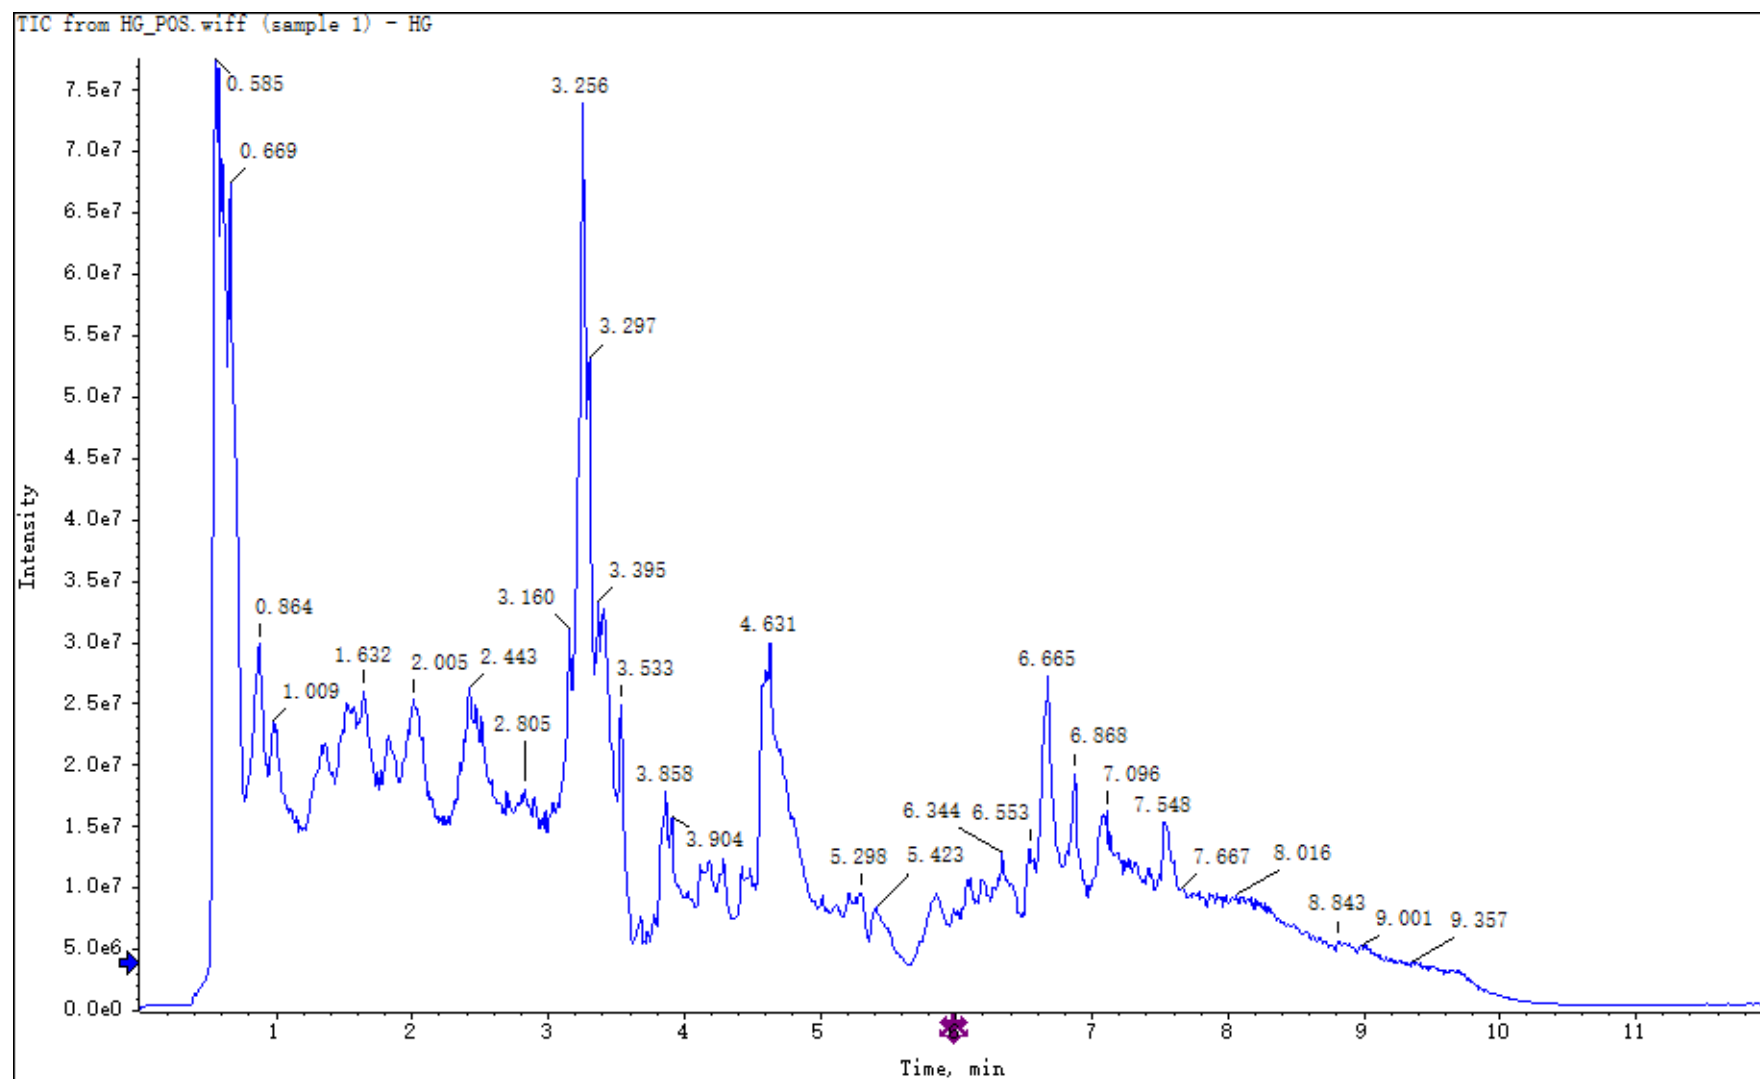

Supplement: Data_Sheet_1.ZIP [file Data_Sheet_1.ZIP]

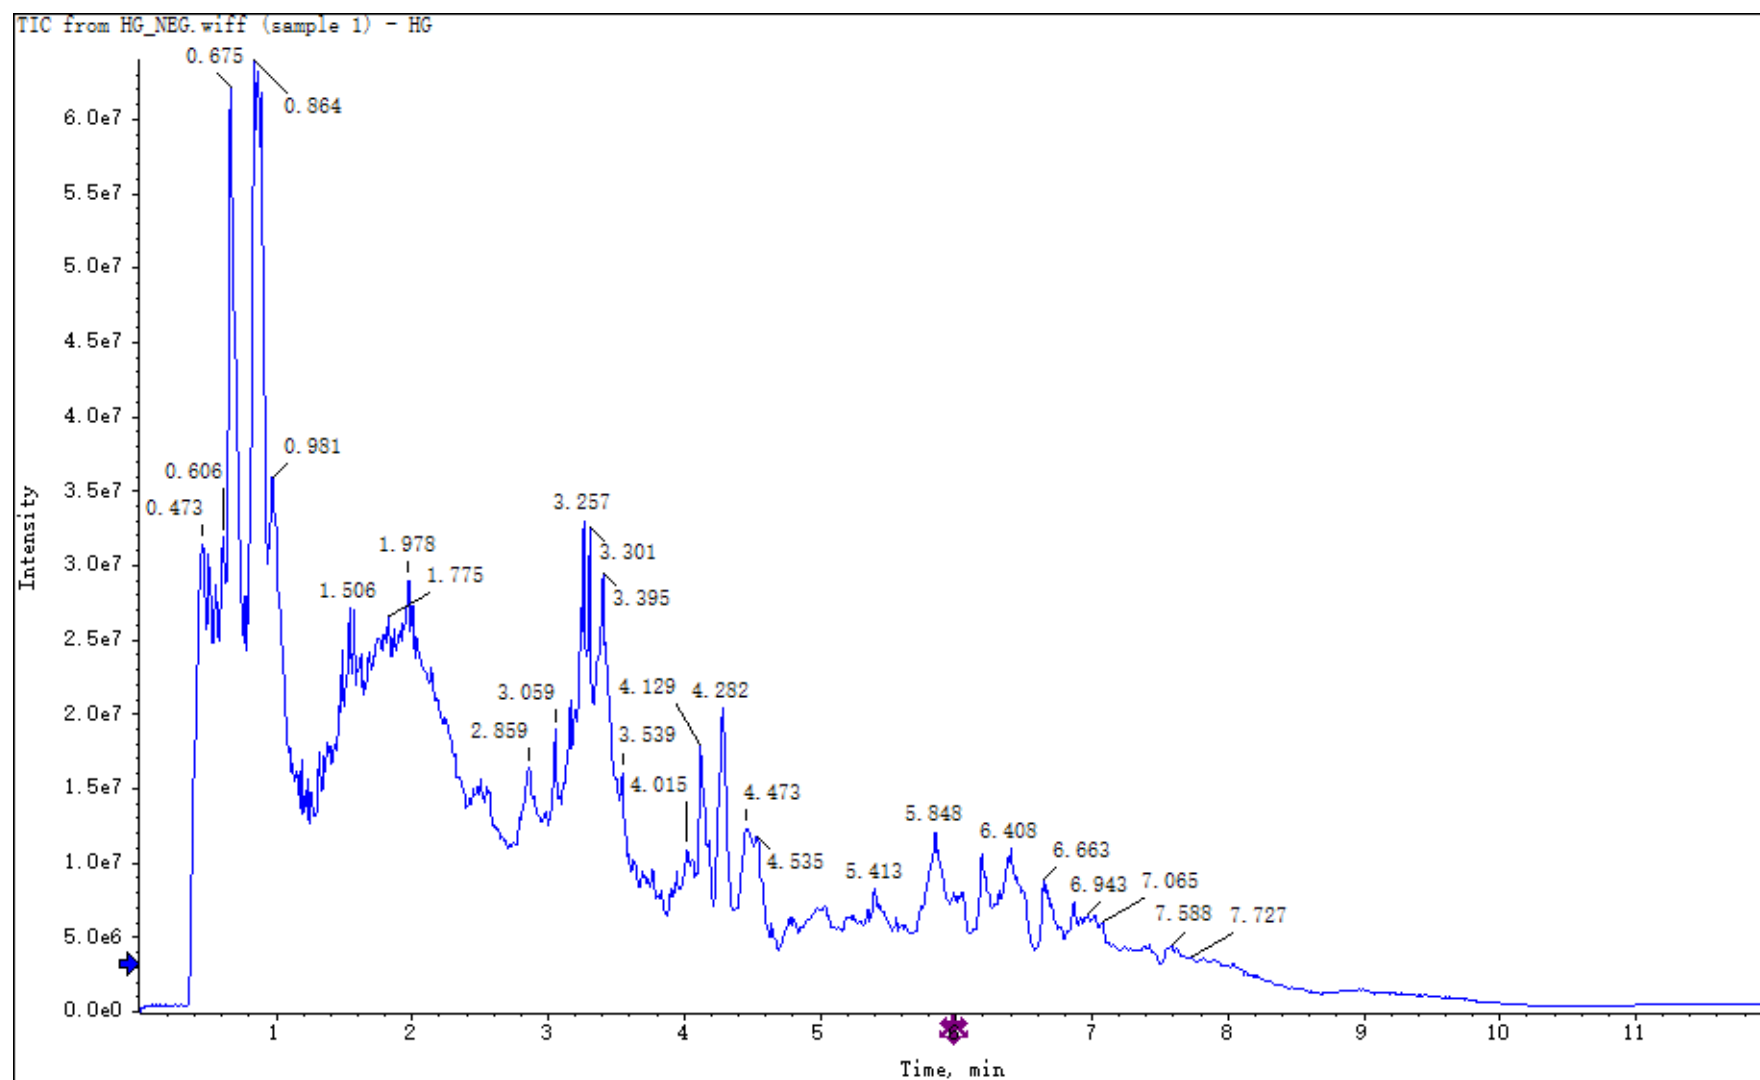

Supplement: Data_Sheet_1.ZIP [file Data_Sheet_1.ZIP]
